# Supplementary material for: Nouns slow down speech across structurally and culturally diverse languages
Source: PubMed Central journal article supplement — Proc Natl Acad Sci U S A. 2018 May 14;115(22):5720–5. doi: 10.1073/pnas.1800708115 (PMC5984521; doi:10.1073/pnas.1800708115), 2018-05-14
Supplement: pnas.1800708115.sapp.pdf [file pnas.1800708115.sapp.pdf]

## Supplementary Information for

### Nouns slow down speech across structurally and culturally diverse languages

Frank Seifart, Jan Strunk, Swintha Danielsen, Iren Hartmann, Brigitte Pakendorf, Søren Wichmann, Alena Witzlack-Makarevich, Nivja H. de Jong, and Balthasar Bickel

Corresponding author: Frank Seifart  
Email: f.c.seifart@uval.nl

#### **This PDF file includes:**

|                                                                                                                          |    |
|--------------------------------------------------------------------------------------------------------------------------|----|
| Supplementary Text .....                                                                                                 | 3  |
| Supplementary Tables .....                                                                                               | 7  |
| Table S1: Basic corpus statistics .....                                                                                  | 7  |
| Table S2: Statistics on pre-word context windows per language .....                                                      | 7  |
| Table S3: Differences in mean length of pre-word windows in the nine languages .....                                     | 7  |
| Table S4: Data preparation for main study articulation rate (excl. known auxiliaries) ..                                 | 8  |
| Table S5: Data preparation for alternative study articulation rate (incl. auxiliaries) .....                             | 9  |
| Table S6: Summary statistics of articulation rate in pre-word windows by language ..                                     | 10 |
| Table S7: Articulation rate in pre-word windows depending on word class of target<br>word for individual languages ..... | 10 |
| Table S8: Comparison of models for predicting articulation rate in all nine languages                                    | 11 |
| Table S9: Model predicting articulation rate in all nine languages .....                                                 | 12 |
| Table S10: Model predicting articulation rate in Baure .....                                                             | 12 |
| Table S11: Model predicting articulation rate in Bora .....                                                              | 13 |

|                                                                                                                              |    |
|------------------------------------------------------------------------------------------------------------------------------|----|
| Table S12: Model predicting articulation rate in Chintang .....                                                              | 13 |
| Table S13: Model predicting articulation rate in Dutch.....                                                                  | 13 |
| Table S14: Model predicting articulation rate in English .....                                                               | 14 |
| Table S15: Model predicting articulation rate in Even .....                                                                  | 14 |
| Table S16: Model predicting articulation rate in Hoocak .....                                                                | 14 |
| Table S17: Model predicting articulation rate in Nlɲg .....                                                                  | 15 |
| Table S18: Model predicting articulation rate in Texistepec.....                                                             | 15 |
| Table S19: Comparison of models for predicting articulation rate (incl. auxiliaries) in all nine languages.....              | 16 |
| Table S20: Model predicting articulation rate (incl. auxiliaries) in all nine languages                                      | 17 |
| Table S21: Model predicting articulation rate (incl. auxiliaries) in English .....                                           | 17 |
| Table S22: Model predicting articulation rate (incl. auxiliaries) in Even .....                                              | 18 |
| Table S23: Model predicting articulation rate (incl. auxiliaries) in Hoocak .....                                            | 18 |
| Table S24: Model predicting articulation rate (incl. auxiliaries) in Texistepec .....                                        | 18 |
| Table S25: Size of word class effect on articulation rate .....                                                              | 18 |
| Table S26: Data preparation for main study pause probability (excl. known auxiliaries) .....                                 | 19 |
| Table S27: Data preparation for alternative study pause probability (incl. auxiliaries)                                      | 20 |
| Table S28: Summary statistics of pause probability by language .....                                                         | 21 |
| Table S29: Probability of (silent and/or filled) pauses depending on word class of target word for individual languages..... | 21 |
| Table S30: Probability of silent pauses depending on word class of target word for individual languages.....                 | 22 |
| Table S31: Probability of filled pauses depending on word class of target word for individual languages.....                 | 23 |
| Table S32: Comparison of models for predicting pause probability .....                                                       | 23 |
| Table S33: Model predicting pause probability in all nine languages .....                                                    | 24 |
| Table S34: Model predicting pause probability in Baure.....                                                                  | 24 |
| Table S35: Model predicting pause probability in Bora .....                                                                  | 24 |
| Table S36: Model predicting pause probability in Chintang.....                                                               | 25 |
| Table S37: Model predicting pause probability in Dutch .....                                                                 | 25 |
| Table S38: Model predicting pause probability in English .....                                                               | 25 |
| Table S39: Model predicting pause probability in Even.....                                                                   | 25 |
| Table S40: Model predicting pause probability in Hoocak.....                                                                 | 25 |
| Table S41: Model predicting pause probability in Nlɲg .....                                                                  | 26 |
| Table S42: Model predicting pause probability in Texistepec .....                                                            | 26 |
| Table S43: Comparison of models for predicting pause probability (incl. auxiliaries) in all nine languages.....              | 26 |
| Table S44: Model predicting pause probability (incl. auxiliaries) in all nine languages .....                                | 27 |
| Table S45: Model predicting pause probability (incl. auxiliaries) in English.....                                            | 27 |
| Table S46: Model predicting pause probability (incl. auxiliaries) in Even.....                                               | 27 |
| Table S47: Model predicting pause probability (incl. auxiliaries) in Hoocak.....                                             | 28 |
| Table S48: Model predicting pause probability (incl. auxiliaries) in Texistepec .....                                        | 28 |
| Table S49: Size of word class effect on pause probability.....                                                               | 28 |
| References .....                                                                                                             | 29 |

## Supplementary Text

**Additional results articulation rate study.** Here we provide discussion of additional results from our study of articulation rate, also taking into account interactions of the effect of word class with position and alternative analyses in which auxiliaries are included as verbs. In our main study, word class and its interaction with position are significant predictors (Tables S8 and S9). Articulation rate is predicted to be higher before verbs than before nouns, but the difference is smaller towards the end of an utterance than at the beginning: While contexts before verbs are predicted to be about half a segment per second (0.5113 segments per second) faster than contexts before nouns at the beginning of utterances, contexts before verbs are only 0.1375 segments per second faster than contexts before nouns at the end of utterances. Crucially, the interaction of word class and position only reduces but never reverses the articulation rate advantage for verbal vs. nominal contexts. The strength of the word class effect, however, depends on the particular language, as indicated by the significant interaction of word class and language. Note that the coefficients of the word class:language interaction is positive for most languages (Table S9), which indicates that the word class effect is stronger in these languages than in Bora (which is used as the reference for the language factor here). In fact, in a model without language and the word class:language interaction as fixed effects, contexts before verbs are predicted to be 0.8556 segments per second faster than contexts before nouns at the beginning of an utterance and 0.4730 segments per second faster at the end of an utterance. In addition to the effect of word class, there is a significant effect of word length, in that articulation is slightly faster before longer words. This effect is even more pronounced towards the end of an utterance (significant interaction of word length and position). Languages, of course, also vary greatly with regard to the predicted average articulation rate (highly significant effect of language). However, both standardized coefficients and likelihood ratio tests indicate that the effect of word class on articulation rate is stronger than the effects of the other predictor variables.

Linear mixed-effects analyses of the nine individual languages show that in seven of these languages—Baure, Chintang, Dutch, English, Even, Hoocak, Texistepec—there is a significant effect of word class on articulation rate (Tables S10-18, cf. also Fig. 3A in the main text), while the effect of word class on articulation rate is not significant in Bora and Nlɪŋg. In Baure, Chintang, Even, and Hoocak, there is a significant positive effect of word class, indicating higher articulation rates before verbs than before nouns and no significant interaction of word class and position. The interaction of word class and position is, however, required for a good model fit in Dutch, English, and Texistepec. In Texistepec, the interaction indicates a reduction (not a reversion) of the articulation rate advantage of contexts before verbs compared to contexts before nouns towards the end of the utterance (maximal difference of 3.5472 segments per second at the beginning of utterances, minimal difference of 0.3763 segments per second at the end of utterances). In Dutch, by contrast, the interaction reverses the effect. Contexts before verbs are faster than contexts before nouns only for positions toward the beginning of utterances ( $< 0.89$ ). These represent 74.83% of the Dutch data (maximal difference of 1.2582 segments per second at position 0). In later positions, which make up 25.17% of the Dutch data,

contexts before nouns are faster than contexts before verbs (predicted articulation rate difference of -0.1594 segments per second at position 1), against the cross-linguistic pattern. For English, in contrast, the coefficient of the word class effect is negative, indicating faster contexts before nouns than before verbs at position 0 (difference = -0.3136 segments per second), but this effect is reversed after position 0.33 (that is, for 75.65% of the English data) with a higher predicted articulation rate before verbs than before nouns towards the end of utterances (difference = 0.6897 segments per second). We currently do not have an explanation for these interactions, but we note that our main results still hold for the vast majority of the contexts, even in Dutch and English. Note that in Fig. 3 in the main text we show the overall effect of word class, averaging over positions, in order to simplify the visual representation.

In an additional study we included auxiliaries with verbs. Here, word class is again a highly significant predictor in the final model, as reported in Tables S19 and S20. In addition, there is again a significant interaction of position and word class. While at the beginning of utterances contexts before verbs are about half a segment per second (0.5260 segments per second) faster than contexts before nouns, at the end of utterances contexts before verbs are only 0.1349 segments per second faster than contexts before nouns. The interaction of word class and position thus reduces but never reverses the articulation rate advantage for verbs compared to nouns. However, positive coefficients for most languages in the word class:language interaction again suggests that the effect of word class is even stronger in some individual languages (compared to Bora, which is again used as reference language here). In fact, in a model without language and the word class:language interaction as fixed effects, contexts before verbs are predicted to be 0.8767 segments per second faster than contexts before nouns at the beginning of an utterance and 0.4753 segments per second faster at the end of an utterance. In addition to the effects of word class, there is again a significant effect of word length in that articulation is slightly faster before longer words. This effect is even more pronounced towards the end of an utterance (significant interaction of word length and position). Languages again also vary greatly with regard to the predicted average articulation rate (highly significant effect of language) and also with regard to the strength of the word class effect on articulation rate (significant interaction of word class and language).

Individual linear-mixed effects analyses of the four languages in which auxiliaries are annotated as a separate category—English, Even, Hoocak, and Texistepec—yield very similar results: The effect of word class is still statistically significant according to likelihood ratio tests when these auxiliaries are included in the category of verbs (see Tables S21-24). In Even and Hoocak, contexts before verbs always exhibit a higher articulation rate than contexts before nouns, also when including known auxiliaries. The interaction between word class and position is still significant in English and Texistepec when auxiliaries are included. In Texistepec, this interaction does not reverse the effect of word class, so contexts before verbs are always faster than contexts before nouns, regardless of position: the maximal difference obtains at the beginning of utterances (3.6225 segments per second), and the minimal difference at the end of utterances (0.3501 segments per second). In English, in contrast, the word class effect is again reversed at the beginning of utterances (positions < 0.29), in that contexts before nouns are predicted to be 0.2720 segments per seconds faster than contexts before verbs at the beginning of utterances (23.20% of the English data), while contexts before verbs are

predicted to be 0.7165 segments per second faster than contexts before nouns for positions  $> 0.29$  (76.80% of the data).

To summarize the overall results of our different analyses of articulation rate, predictions for the beginning and end of utterances for individual languages (Table S25) show that in almost all cases, articulation rates in contexts before nouns are slower than in contexts before verbs. The exceptions are Bora and Nlɲg, where the word class effect is not statistically significant, and partly also Dutch and English, where the word class effect is reversed for some positions, at the end of utterances in Dutch and at the beginning of utterances in English. Including known auxiliaries in the analyses does not change the results substantially. Overall, the predicted articulation rate is about 0.6 segments per second slower before nouns than before verbs. While this may seem like a relatively minor difference, it has to be taken into account that the mean number of segments per pre-word window in the whole corpus is 6.98 (std. dev. 3.36 segments) and the overall mean articulation rate is just 17.16 segments per second (std. dev. 6.57 segments per second). The predictions of our models thus correspond roughly to a 3.56% difference in articulation rates when comparing contexts before nouns and verbs. This can be compared to articulation rate differences of about 10.56% between different speakers (estimated from the standard deviation of the speaker random intercept in the cross-linguistic model, see Table S9).

**Additional results pause probability study.** Here we provide discussion of additional results from our study of pause probability, also taking into account the difference between silent and filled pauses and alternative analyses in which auxiliaries are included as verbs. Descriptive statistics on the probability of silent and filled pauses separately (Tables S29-31) show that silent pauses follow essentially the same pattern as silent and/or filled pauses taken together in that the probability of silent pauses before nouns is higher than before a verb, both when including or excluding auxiliaries, except in English. Filled pauses are more likely before nouns than verbs in all languages.

In our main study of pause probabilities, word class is a highly significant predictor (Tables S32-33). Cross-linguistically, there is a significantly lower probability of encountering a pause before a verb than before a noun (odds ratio: 0.5800). Moreover, a higher length of the target word and a later position both increase the probability of a pause in the context. The standardized coefficients, however, suggest that these two effects are weaker than the effect of word class. In separate analyses for individual languages (Tables S34-42), the probability of pauses is significantly lower before verbs than before nouns in six out of nine languages: Bora, Chintang, Even, Hoocak, Nlɲg, and Texistepec. In Baure and Dutch, the word class effect goes in the same direction (more pauses before nouns than before verbs) but is not statistically significant according to the likelihood-ratio tests. For English, however, the effect is reversed: The probability of pauses is significantly higher before verbs than before nouns. This needs further research, but for now we conclude that English deviates from the patterns reflected in all other languages.

In our alternative study of pause probabilities (including auxiliaries with verbs), word class is again a highly significant predictor of pause probability, as reported in Tables S42 and S44. Cross-linguistically, the model predicts a significantly lower probability of encountering a pause before a verb than before a noun (odds ratio =

0.5796). Moreover, the significant effects of word length and position again indicates that pauses are more likely to occur before longer words than shorter words and towards the end of utterances. In separate models for the individual languages (Tables S45-48) the probability of pauses remains significantly lower before verbs than before nouns after inclusion of auxiliaries in three out of the four languages that have auxiliaries (Even, Hoocak, Texistepec). For English, however, the effect is again reversed: The probability of pauses is significantly higher before verbs than before nouns.

To summarize the overall results of our different analyses of pause probabilities, the predicted probabilities of pauses before nouns and verbs and the corresponding probability ratios (relative risks) and odds ratios for the individual languages (Table S49) show the following pattern: All odds ratios, except those for English, are above one, which means that pauses are more probable before nouns than before verbs in all languages except English (the factor word class is, however, not statistically significant in the generalized linear mixed-effects models for Baure and Dutch). Averaging across the nine languages, we obtain a probability ratio of about 1.6 and an odds ratio of about 1.7 for pauses before nouns versus pauses before verbs. There are thus on average about 60% more pauses before nouns than before verbs. In many languages, the probability ratio is almost 2, indicating that pauses before nouns are twice as likely as pauses before verbs (corresponding to a 100% increase in pause probability for nouns compared to verbs).

## Supplementary Tables

**Table S1: Basic corpus statistics**

| Language   | Language information |            |               |                 | Corpus information |            |                |                             |
|------------|----------------------|------------|---------------|-----------------|--------------------|------------|----------------|-----------------------------|
|            | 639-3 code           | Glottocode | Family        | Area            | Speakers           | Texts      | Words          | Reference                   |
| Baure      | brg                  | baur1253   | Arawakan      | Amazonia        | 12                 | 37         | 17,652         | Danielsen et al. (2009) (1) |
| Bora       | boa                  | bora1263   | Boran         | Amazonia        | 46                 | 37         | 29,802         | Seifart (2009) (2)          |
| Chintang   | ctn                  | chhi1245   | Sino-Tibetan  | Himalayas       | 74                 | 40         | 37,737         | Bickel et al. (2011) (3)    |
| Dutch      | nld                  | duct1256   | Indo-European | Europe          | 42                 | 17         | 39,519         | CGN-consortium (2003) (4)   |
| English    | eng                  | stan1293   | Indo-European | North America   | 80                 | 47         | 56,135         | Calhoun et al. (2009) (5)   |
| Even       | eve                  | lamu1253   | Tungusic      | Siberia         | 32                 | 67         | 37,430         | Pakendorf et al. (2010) (6) |
| Hoocək     | win                  | hoch1243   | Siouan        | North America   | 28                 | 62         | 23,191         | Hartmann (2013) (7)         |
| Nlɪŋg      | ngh                  | nuuu1241   | !Ui-Taa       | Southern Africa | 7                  | 33         | 26,061         | Güldemann et al. (2011) (8) |
| Texistepec | poq                  | texi1237   | Mixe-Zoquean  | Central America | 1                  | 6          | 21,321         | Wichmann (1996) (9)         |
| <b>Sum</b> |                      |            |               |                 | <b>322</b>         | <b>346</b> | <b>288,848</b> |                             |

Notes: The corpus of Even documents the Lamunxhin variety of Even, and the Texistepec language is also sometimes ambiguously referred to as (Texistepec) Popoluca. Unambiguous language codes are provided with ISO 639-3/Ethnologue (10) and Glottolog (11) standards.

**Table S2: Statistics on pre-word context windows per language**

| Language    | AUs           | Words per AU | Pre-word windows | Size of pre-word windows (ms) |            | Excluded first words (%) |
|-------------|---------------|--------------|------------------|-------------------------------|------------|--------------------------|
|             |               |              |                  | Mean                          | Std. Dev.  |                          |
| Baure       | 4 343         | 4.06         | 17 652           | 477                           | 200        | 24.60 %                  |
| Bora        | 3 979         | 7.49         | 29 802           | 489                           | 168        | 13.35 %                  |
| Chintang    | 9 026         | 4.18         | 37 737           | 454                           | 159        | 23.92 %                  |
| Dutch       | 5 822         | 6.79         | 39 519           | 442                           | 146        | 14.73 %                  |
| English     | 6 941         | 8.09         | 56 135           | 457                           | 139        | 12.36 %                  |
| Even        | 4 839         | 7.74         | 37 430           | 485                           | 148        | 12.93 %                  |
| Hoocək      | 2 936         | 7.90         | 23 191           | 495                           | 192        | 12.66 %                  |
| Nlɪŋg       | 7 990         | 3.26         | 26 061           | 357                           | 166        | 30.66 %                  |
| Texistepec  | 5 461         | 3.90         | 21 321           | 419                           | 165        | 25.61 %                  |
| <b>Sum</b>  | <b>51 337</b> |              | <b>288 848</b>   |                               |            |                          |
| <b>Mean</b> |               | <b>5.63</b>  |                  | <b>456</b>                    | <b>164</b> | <b>17.77 %</b>           |

Notes: AU = annotation unit; Nlɪŋg has both the shortest annotation units on average and the shortest mean length of pre-word windows. For this reason, Nlɪŋg also has the highest percentage of excluded first words in annotation units compared to the other languages.

**Table S3: Differences in mean length of pre-word windows in the nine languages**

| language   | excluding silence (analysis of articulation rate) |                         |                  |                         |                 | including silence (analysis of pause probability) |                         |                  |                         |                 |
|------------|---------------------------------------------------|-------------------------|------------------|-------------------------|-----------------|---------------------------------------------------|-------------------------|------------------|-------------------------|-----------------|
|            | nouns                                             |                         | verbs            |                         | difference (ms) | nouns                                             |                         | verbs            |                         | difference (ms) |
|            | mean length (ms)                                  | standard deviation (ms) | mean length (ms) | standard deviation (ms) |                 | mean length (ms)                                  | standard deviation (ms) | mean length (ms) | standard deviation (ms) |                 |
| Baure      | 447                                               | 193                     | 455              | 201                     | -8              | 467                                               | 182                     | 473              | 189                     | -6              |
| Bora       | 453                                               | 166                     | 463              | 186                     | -10             | 493                                               | 146                     | 500              | 163                     | -7              |
| Chintang   | 427                                               | 167                     | 442              | 154                     | -15             | 450                                               | 160                     | 460              | 148                     | -10             |
| Dutch      | 440                                               | 139                     | 381              | 173                     | 59              | 468                                               | 125                     | 413              | 167                     | 55              |
| English    | 453                                               | 138                     | 387              | 174                     | 66              | 484                                               | 114                     | 438              | 155                     | 46              |
| Even       | 450                                               | 168                     | 477              | 155                     | -27             | 483                                               | 144                     | 498              | 139                     | -15             |
| Hoocək     | 501                                               | 191                     | 510              | 177                     | -9              | 501                                               | 155                     | 516              | 158                     | -15             |
| Nlɪŋg      | 393                                               | 151                     | 294              | 151                     | 99              | 430                                               | 140                     | 321              | 160                     | 109             |
| Texistepec | 431                                               | 156                     | 360              | 173                     | 71              | 460                                               | 141                     | 385              | 172                     | 75              |

**Table S4: Data preparation for main study articulation rate (excl. known auxiliaries).**

| Language   | Word Class | Initial Contexts | Contexts Left After Excluding        |                                      |                   |                                               |                         |                                      |                                                   | Excluded relevant target words (N and V) |
|------------|------------|------------------|--------------------------------------|--------------------------------------|-------------------|-----------------------------------------------|-------------------------|--------------------------------------|---------------------------------------------------|------------------------------------------|
|            |            |                  | Target words not N or V <sup>a</sup> | Target words with both N and V roots | First words in AU | Disfluencies or filled pauses as target words | Contexts of length zero | Empty contexts (containing no words) | Contexts containing disfluencies or filled pauses |                                          |
| Baure      | All        | 17 652           | 7 917                                | 7 843                                | 6 474             | 6 474                                         | 6 364                   | 5 751                                | 5 573                                             | 29.61 %                                  |
|            | N          | 2 778            | 2 778                                | 2 704                                | 2 454             | 2 454                                         | 2 427                   | 2 167                                | 2 099                                             | 24.44 %                                  |
|            | V          | 5 213            | 5 213                                | 5 139                                | 4 020             | 4 020                                         | 3 937                   | 3 584                                | 3 474                                             | 33.36 %                                  |
| Bora       | All        | 29 802           | 14 181                               | 14 180                               | 13 476            | 13 472                                        | 13 316                  | 10 631                               | 10 396                                            | 26.69 %                                  |
|            | N          | 5 913            | 5 913                                | 5 912                                | 5 566             | 5 566                                         | 5 507                   | 4 105                                | 3 974                                             | 32.79 %                                  |
|            | V          | 8 269            | 8 269                                | 8 268                                | 7 910             | 7 906                                         | 7 809                   | 6 526                                | 6 422                                             | 22.34 %                                  |
| Chintang   | All        | 37 737           | 15 263                               | 15 260                               | 12 364            | 12 347                                        | 12 283                  | 11 462                               | 11 091                                            | 27.33 %                                  |
|            | N          | 6 607            | 6 607                                | 6 604                                | 4 985             | 4 969                                         | 4 942                   | 4 464                                | 4 279                                             | 35.24 %                                  |
|            | V          | 8 659            | 8 659                                | 8 656                                | 7 379             | 7 378                                         | 7 341                   | 6 998                                | 6 812                                             | 21.33 %                                  |
| Dutch      | All        | 39 519           | 10 660                               | 10 660                               | 10 164            | 10 164                                        | 10 147                  | 9 965                                | 9 285                                             | 12.90 %                                  |
|            | N          | 3 973            | 3 973                                | 3 973                                | 3 863             | 3 863                                         | 3 853                   | 3 768                                | 3 466                                             | 12.76 %                                  |
|            | V          | 6 687            | 6 687                                | 6 687                                | 6 301             | 6 301                                         | 6 294                   | 6 197                                | 5 819                                             | 12.98 %                                  |
| English    | All        | 56 135           | 18 677                               | 18 674                               | 18 315            | 18 294                                        | 18 282                  | 17 719                               | 17 210                                            | 7.85 %                                   |
|            | N          | 7 777            | 7 777                                | 7 774                                | 7 542             | 7 521                                         | 7 516                   | 7 246                                | 7 029                                             | 9.62 %                                   |
|            | V          | 10 903           | 10 903                               | 10 900                               | 10 773            | 10 773                                        | 10 766                  | 10 473                               | 10 181                                            | 6.62 %                                   |
| Even       | All        | 37 430           | 18 378                               | 18 378                               | 17 215            | 17 129                                        | 17 017                  | 14 223                               | 12 897                                            | 29.82 %                                  |
|            | N          | 8 835            | 8 835                                | 8 835                                | 7 980             | 7 948                                         | 7 892                   | 6 137                                | 5 342                                             | 39.54 %                                  |
|            | V          | 9 543            | 9 543                                | 9 543                                | 9 235             | 9 181                                         | 9 125                   | 8 086                                | 7 555                                             | 20.83 %                                  |
| Hoocak     | All        | 23 191           | 9 954                                | 9 821                                | 9 149             | 9 149                                         | 8 825                   | 6 412                                | 6 195                                             | 37.76 %                                  |
|            | N          | 3 683            | 3 670                                | 3 537                                | 3 091             | 3 091                                         | 2 968                   | 1 767                                | 1 646                                             | 55.15 %                                  |
|            | V          | 6 903            | 6 417                                | 6 284                                | 6 058             | 6 058                                         | 5 857                   | 4 645                                | 4 549                                             | 29.11 %                                  |
| N  ng      | All        | 26 061           | 11 881                               | 11 881                               | 9 724             | 9 630                                         | 9 619                   | 9 314                                | 9 029                                             | 24.00 %                                  |
|            | N          | 4 415            | 4 415                                | 4 415                                | 3 336             | 3 296                                         | 3 290                   | 3 128                                | 2 993                                             | 32.21 %                                  |
|            | V          | 7 466            | 7 466                                | 7 466                                | 6 388             | 6 334                                         | 6 329                   | 6 186                                | 6 036                                             | 19.15 %                                  |
| Texistepec | All        | 21 321           | 8 866                                | 8 723                                | 7 603             | 7 595                                         | 7 586                   | 7 200                                | 7 156                                             | 19.29 %                                  |
|            | N          | 2 738            | 2 738                                | 2 595                                | 2 393             | 2 386                                         | 2 382                   | 2 154                                | 2 136                                             | 21.99 %                                  |
|            | V          | 6 272            | 6 271                                | 6 128                                | 5 210             | 5 209                                         | 5 204                   | 5 046                                | 5 020                                             | 19.95 %                                  |
| Overall    | All        | <b>288 848</b>   | <b>115 777</b>                       | <b>115 420</b>                       | <b>104 484</b>    | <b>104 254</b>                                | <b>103 439</b>          | <b>92 677</b>                        | <b>88 832</b>                                     | <b>23.27 %</b>                           |
|            | N          | <b>46 719</b>    | <b>46 706</b>                        | <b>46 349</b>                        | <b>41 210</b>     | <b>41 094</b>                                 | <b>40 777</b>           | <b>34 936</b>                        | <b>32 964</b>                                     | <b>29.42 %</b>                           |
|            | V          | <b>69 915</b>    | <b>69 428</b>                        | <b>69 071</b>                        | <b>63 274</b>     | <b>63 160</b>                                 | <b>62 662</b>           | <b>57 741</b>                        | <b>55 868</b>                                     | <b>19.53 %</b>                           |

Note: <sup>a</sup> Since words can contain multiple roots of different word class categories, the respective N and V rows in this column (column 4) do not necessarily sum exactly to the value in the respective All row. This is, however, the case for the remainder of the columns after excluding target words containing both N and V roots in column 5. (AU = annotation unit)



**Table S5: Data preparation for alternative study articulation rate (incl. auxiliaries).**

| Language   | Word Class       | Initial Contexts | Contexts Left After Excluding              |                                      |                   |                                               |                         |                                      |                                                   | Excluded contexts |
|------------|------------------|------------------|--------------------------------------------|--------------------------------------|-------------------|-----------------------------------------------|-------------------------|--------------------------------------|---------------------------------------------------|-------------------|
|            |                  |                  | Target words not N, V, or AUX <sup>a</sup> | Target words with both N and V roots | First words in AU | Disfluencies or filled pauses as target words | Contexts of length zero | Empty contexts (containing no words) | Contexts containing disfluencies or filled pauses |                   |
| Baure      | All              | 17 652           | 7 917                                      | 7 843                                | 6 474             | 6 474                                         | 6 364                   | 5 751                                | 5 573                                             | 29.61 %           |
|            | N                | 2 778            | 2 778                                      | 2 704                                | 2 454             | 2 454                                         | 2 427                   | 2 167                                | 2 099                                             | 24.44 %           |
|            | V                | 5 213            | 5 213                                      | 5 139                                | 4 020             | 4 020                                         | 3 937                   | 3 584                                | 3 474                                             | 33.36 %           |
| Bora       | All              | 29 802           | 14 181                                     | 14 180                               | 13 476            | 13 472                                        | 13 316                  | 10 631                               | 10 396                                            | 26.69 %           |
|            | N                | 5 913            | 5 913                                      | 5 912                                | 5 566             | 5 566                                         | 5 507                   | 4 105                                | 3 974                                             | 32.79 %           |
|            | V                | 8 269            | 8 269                                      | 8 268                                | 7 910             | 7 906                                         | 7 809                   | 6 526                                | 6 422                                             | 22.34 %           |
| Chintang   | All              | 37 737           | 15 263                                     | 15 260                               | 12 364            | 12 347                                        | 12 283                  | 11 462                               | 11 091                                            | 27.33 %           |
|            | N                | 6 607            | 6 607                                      | 6 604                                | 4 985             | 4 969                                         | 4 942                   | 4 464                                | 4 279                                             | 35.24 %           |
|            | V                | 8 659            | 8 659                                      | 8 656                                | 7 379             | 7 378                                         | 7 341                   | 6 998                                | 6 812                                             | 21.33 %           |
| Dutch      | All              | 39 519           | 10 660                                     | 10 660                               | 10 164            | 10 164                                        | 10 147                  | 9 965                                | 9 285                                             | 12.90 %           |
|            | N                | 3 973            | 3 973                                      | 3 973                                | 3 863             | 3 863                                         | 3 853                   | 3 768                                | 3 466                                             | 12.76 %           |
|            | V                | 6 687            | 6 687                                      | 6 687                                | 6 301             | 6 301                                         | 6 294                   | 6 197                                | 5 819                                             | 12.98 %           |
| English    | All              | 56 135           | 20 551                                     | 20 548                               | 20 185            | 20 161                                        | 20 149                  | 19 566                               | 19 027                                            | 7.42 %            |
|            | N                | 7 777            | 7 777                                      | 7 774                                | 7 542             | 7 521                                         | 7 516                   | 7 246                                | 7 029                                             | 9.62 %            |
|            | V                | 10 903           | 10 903                                     | 10 900                               | 10 773            | 10 773                                        | 10 766                  | 10 473                               | 10 181                                            | 6.62 %            |
|            | AUX <sup>b</sup> | 1 874            | 1 874                                      | 1 874                                | 1 870             | 1 867                                         | 1 867                   | 1 847                                | 1 817                                             | 3.04 %            |
| Even       | All              | 37 430           | 19 003                                     | 19 003                               | 17 788            | 17 700                                        | 17 588                  | 14 741                               | 13 379                                            | 29.60 %           |
|            | N                | 8 835            | 8 835                                      | 8 835                                | 7 980             | 7 948                                         | 7 892                   | 6 137                                | 5 342                                             | 39.54 %           |
|            | V                | 9 543            | 9 543                                      | 9 543                                | 9 235             | 9 181                                         | 9 125                   | 8 086                                | 7 555                                             | 20.83 %           |
|            | AUX <sup>b</sup> | 625              | 625                                        | 625                                  | 573               | 571                                           | 571                     | 518                                  | 482                                               | 22.88 %           |
| Hoocak     | All              | 23 191           | 11 504                                     | 11 358                               | 10 647            | 10 647                                        | 10 263                  | 7 646                                | 7 413                                             | 35.56 %           |
|            | N                | 3 683            | 3 683                                      | 3 537                                | 3 091             | 3 091                                         | 2 968                   | 1 767                                | 1 646                                             | 55.31 %           |
|            | V                | 6 903            | 6 903                                      | 6 770                                | 6 531             | 6 531                                         | 6 314                   | 5 034                                | 4 926                                             | 28.64 %           |
|            | AUX <sup>b</sup> | 1 064            | 1 064                                      | 1 051                                | 1 025             | 1 025                                         | 981                     | 845                                  | 841                                               | 20.96 %           |
| N  ng      | All              | 26 061           | 11 881                                     | 11 881                               | 9 724             | 9 630                                         | 9 619                   | 9 314                                | 9 029                                             | 24.00 %           |
|            | N                | 4 415            | 4 415                                      | 4 415                                | 3 336             | 3 296                                         | 3 290                   | 3 128                                | 2 993                                             | 32.21 %           |
|            | V                | 7 466            | 7 466                                      | 7 466                                | 6 388             | 6 334                                         | 6 329                   | 6 186                                | 6 036                                             | 19.15 %           |
| Texistepec | All              | 21 321           | 10 916                                     | 10 773                               | 8 959             | 8 948                                         | 8 939                   | 8 453                                | 8 395                                             | 23.09 %           |
|            | N                | 2 738            | 2 738                                      | 2 595                                | 2 393             | 2 386                                         | 2 382                   | 2 154                                | 2 136                                             | 21.99 %           |
|            | V                | 6 272            | 6 272                                      | 6 129                                | 5 211             | 5 210                                         | 5 205                   | 5 047                                | 5 021                                             | 19.95 %           |
|            | AUX <sup>b</sup> | 2 049            | 2 049                                      | 2 049                                | 1 355             | 1 352                                         | 1 352                   | 1 252                                | 1 238                                             | 39.58 %           |
| Overall    | All              | <b>288 848</b>   | <b>121 876</b>                             | <b>121 506</b>                       | <b>109 781</b>    | <b>109 543</b>                                | <b>108 668</b>          | <b>97 529</b>                        | <b>93 588</b>                                     | <b>23.21 %</b>    |
|            | N                | <b>46 719</b>    | <b>46 719</b>                              | <b>46 349</b>                        | <b>41 210</b>     | <b>41 094</b>                                 | <b>40 777</b>           | <b>34 936</b>                        | <b>32 964</b>                                     | <b>29.44 %</b>    |
|            | V                | <b>69 915</b>    | <b>69 915</b>                              | <b>69 558</b>                        | <b>63 748</b>     | <b>63 634</b>                                 | <b>63 120</b>           | <b>58 131</b>                        | <b>56 246</b>                                     | <b>19.55 %</b>    |
|            | AUX <sup>b</sup> | <b>5 612</b>     | <b>5 612</b>                               | <b>5 599</b>                         | <b>4 823</b>      | <b>4 815</b>                                  | <b>4 771</b>            | <b>4 462</b>                         | <b>4 378</b>                                      | <b>21.99 %</b>    |

Notes: <sup>a</sup> Since words can contain multiple roots of different word class categories, the respective *N* and *V* rows in this column do not necessarily sum exactly to the value in the respective *All* row. This is, however, the case for the remainder of the columns after excluding target words containing both N and V roots in column 5. <sup>b</sup> Words containing both a V root and an AUX root are counted as V in this Table (but are still excluded from the data for the alternative study excluding auxiliaries summarized in Table S4). Words containing only an AUX root but no V root are counted as auxiliaries. Words containing both a V root and an AUX root still only enter as one observation into the statistical analyses. (AU = annotation unit)

**Table S6: Summary statistics of articulation rate in pre-word windows by language**

| Language   | Variant     | Mean         | Std. Dev.   | Median       | Min         | Max           |
|------------|-------------|--------------|-------------|--------------|-------------|---------------|
| Baure      |             | 13.91        | 4.86        | 13.51        | 2.20        | 55.56         |
| Bora       |             | 17.21        | 6.13        | 16.28        | 1.72        | 108.70        |
| Chintang   |             | 17.31        | 6.36        | 17.07        | 1.17        | 104.65        |
| Dutch      |             | 20.85        | 7.25        | 20.04        | 1.98        | 129.03        |
| English    | with AUX    | 19.04        | 7.38        | 18.46        | 1.45        | 85.11         |
|            | without AUX | 19.01        | 7.35        | 18.42        | 1.45        | 85.11         |
| Even       | with AUX    | 14.92        | 3.83        | 14.89        | 2.35        | 37.63         |
|            | without AUX | 14.88        | 3.82        | 14.83        | 2.35        | 37.63         |
| Hoocak     | with AUX    | 12.90        | 4.24        | 12.50        | 2.48        | 82.09         |
|            | without AUX | 12.88        | 4.33        | 12.45        | 2.48        | 82.09         |
| N  ng      |             | 16.23        | 6.42        | 15.38        | 2.55        | 80.00         |
| Texistepec | with AUX    | 19.18        | 6.68        | 18.42        | 3.03        | 93.75         |
|            | without AUX | 19.22        | 6.60        | 18.43        | 3.74        | 93.75         |
| Overall    | with AUX    | <b>17.17</b> | <b>6.59</b> | <b>16.33</b> | <b>1.17</b> | <b>129.03</b> |
|            | without AUX | <b>17.17</b> | <b>6.57</b> | <b>16.33</b> | <b>1.17</b> | <b>129.03</b> |

**Table S7: Articulation rate in pre-word windows depending on word class of target word for individual languages**

| Language   | word class | Articulation rate |             |              | Comparison    |              |               |
|------------|------------|-------------------|-------------|--------------|---------------|--------------|---------------|
|            |            | Mean              | Std. Dev.   | Median       | Contrast      | Difference   | In-/ Decrease |
| Baure      | N          | 13.60             | 4.53        | 13.38        | N vs. V       | -0.50        | -3.56%        |
|            | V          | 14.10             | 5.04        | 13.64        |               |              |               |
| Bora       | N          | 17.02             | 5.88        | 16.13        | N vs. V       | -0.32        | -1.83%        |
|            | V          | 17.34             | 6.28        | 16.39        |               |              |               |
| Chintang   | N          | 16.50             | 6.58        | 16.13        | N vs. V       | -1.32        | -7.43%        |
|            | V          | 17.82             | 6.16        | 17.65        |               |              |               |
| Dutch      | N          | 20.79             | 6.37        | 20.27        | N vs. V       | -0.10        | -0.46%        |
|            | V          | 20.89             | 7.73        | 19.84        |               |              |               |
| English    | N          | 18.77             | 6.28        | 18.40        | N vs. V       | -0.40        | -2.09%        |
|            | V          | 19.17             | 8.00        | 18.46        |               |              |               |
|            | AUX        | 19.34             | 7.62        | 18.68        | N vs. V + AUX | -0.43        | -2.24%        |
|            | V + AUX    | 19.20             | 7.95        | 18.52        |               |              |               |
| Even       | N          | 14.51             | 4.07        | 14.45        | N vs. V       | -0.63        | -4.15%        |
|            | V          | 15.14             | 3.61        | 15.08        |               |              |               |
|            | AUX        | 16.07             | 3.96        | 16.01        | N vs. V + AUX | -0.68        | -4.51%        |
|            | V + AUX    | 15.19             | 3.64        | 15.12        |               |              |               |
| Hoocak     | N          | 12.21             | 4.03        | 11.98        | N vs. V       | -0.91        | -6.94%        |
|            | V          | 13.12             | 4.37        | 12.57        |               |              |               |
|            | AUX        | 12.96             | 3.67        | 12.72        | N vs. V + AUX | -0.89        | -6.77%        |
|            | V + AUX    | 13.09             | 4.28        | 12.59        |               |              |               |
| N  ng      | N          | 16.24             | 5.89        | 15.63        | N vs. V       | 0.01         | 0.06%         |
|            | V          | 16.23             | 6.67        | 15.38        |               |              |               |
| Texistepec | N          | 18.15             | 5.69        | 17.74        | N vs. V       | -1.52        | -7.73%        |
|            | V          | 19.67             | 6.90        | 18.75        |               |              |               |
|            | AUX        | 18.98             | 7.09        | 18.18        | N vs. V + AUX | -1.38        | -7.09%        |
|            | V + AUX    | 19.54             | 6.94        | 18.64        |               |              |               |
| Overall    | N          | <b>16.86</b>      | <b>6.14</b> | <b>16.22</b> | N vs. V       | <b>-0.46</b> | <b>-2.66%</b> |
|            | V          | <b>17.32</b>      | <b>6.80</b> | <b>16.39</b> |               |              |               |
|            | AUX        | <b>18.65</b>      | <b>6.99</b> | <b>16.67</b> | N vs. V + AUX | <b>-0.48</b> | <b>-2.77%</b> |
|            | V + AUX    | <b>17.34</b>      | <b>6.82</b> | <b>16.39</b> |               |              |               |

**Table S8: Comparison of models for predicting articulation rate in all nine languages**

| Step                         | Fixed effects structure                                                                                                                    | Added                  | AIC     | $\chi^2$ | df | <i>p</i> | sig. |
|------------------------------|--------------------------------------------------------------------------------------------------------------------------------------------|------------------------|---------|----------|----|----------|------|
| <b>1</b><br><b>(initial)</b> | word class + language + word class:language                                                                                                |                        | 567 374 |          |    |          |      |
| <b>2a</b>                    | word class + word length + language + word class:language                                                                                  | word length            | 567 294 | 81.64    | 1  | <0.001   | ***  |
| 2b                           | word class + position + language + word class:language                                                                                     | position               | 567 366 | 9.94     | 1  | 0.002    | **   |
| <b>3a</b>                    | word class + word length + position + language + word class:language                                                                       | position               | 567 282 | 13.93    | 1  | <0.001   | ***  |
| 3b                           | word class + word length + word class:word length + language + word class:language                                                         | word class:word length | 567 295 | 0.51     | 1  | 0.474    | n.s. |
| 4a                           | word class + word length + position + word class:word length + language + word class:language                                              | word class:word length | 567 283 | 0.67     | 1  | 0.412    | n.s. |
| <b>4b</b>                    | word class + word length + position + word class:position + language + word class:language                                                 | word class:position    | 567 277 | 6.97     | 1  | 0.008    | **   |
| 4c                           | word class + word length + position + word length:position + language + word class:language                                                | word length:position   | 567 279 | 4.65     | 1  | 0.031    | *    |
| 5a                           | word class + word length + position + word class:word length + word class:position + language + word class:language                        | word class:word length | 567 278 | 0.91     | 1  | 0.340    | n.s. |
| <b>5b</b><br><b>(final)</b>  | word class + word length + position + word class:position + word length:position + language + word class:language                          | word length:position   | 567 278 | 4.29     | 1  | 0.038    | *    |
| 6                            | word class + word length + position + word class:word length + word class:position + word length:position + language + word class:language | word class:word length | 567 275 | 0.79     | 1  | 0.375    | n.s. |

Notes: Alternative models are given the same step number followed by different letters. The model structure chosen as the next step is marked in bold.

**Table S9: Model predicting articulation rate in all nine languages**

| Fixed effect                              | Coefficient | Std. Error | t Value | Std. Coefficient | $\chi^2$ | df | p      | sig. | p (BH) | sig. (BH) |
|-------------------------------------------|-------------|------------|---------|------------------|----------|----|--------|------|--------|-----------|
| (intercept)                               | 16.9708     | 0.4238     | 40.040  |                  |          |    |        |      |        |           |
| word class = verb                         | 0.5147      | 0.1608     | 3.200   | 0.0378           | 215.89   | 10 | <0.001 | ***  | <0.001 | ***       |
| word length                               | 0.1327      | 0.0532     | 2.500   | 0.0201           | 90.96    | 2  | <0.001 | ***  | <0.001 | ***       |
| position                                  | -0.1011     | 0.1250     | -0.810  | -0.0046          | 25.19    | 3  | <0.001 | ***  | <0.001 | ***       |
| language = Baure                          | -3.7686     | 0.7908     | -4.770  | -0.1390          | 295.38   | 16 | <0.001 | ***  | <0.001 | ***       |
| language = Chintang                       | -0.7718     | 0.5233     | -1.470  | -0.0388          |          |    |        |      |        |           |
| language = Dutch                          | 3.9246      | 0.5640     | 6.960   | 0.1826           |          |    |        |      |        |           |
| language = English                        | 1.4745      | 0.4901     | 3.010   | 0.0886           |          |    |        |      |        |           |
| language = Even                           | -2.4730     | 0.5621     | -4.400  | -0.1325          |          |    |        |      |        |           |
| language = Hoocak                         | -4.4974     | 0.5997     | -7.500  | -0.1742          |          |    |        |      |        |           |
| language = N  ng                          | -0.8774     | 0.8282     | -1.060  | -0.0403          |          |    |        |      |        |           |
| language = Texistepec                     | 1.1131      | 1.8800     | 0.590   | 0.0461           |          |    |        |      |        |           |
| word class = verb : position              | -0.3772     | 0.1468     | -2.570  | -0.0224          | 6.60     | 1  | 0.010  | *    | 0.014  | *         |
| word length : position                    | 0.1444      | 0.0698     | 2.070   | 0.0165           | 4.29     | 1  | 0.039  | *    | 0.050  | n.s.      |
| word class = verb : language = Baure      | 0.2528      | 0.2260     | 1.120   | 0.0075           | 67.26    | 8  | <0.001 | ***  | <0.001 | ***       |
| word class = verb : language = Chintang   | 0.9577      | 0.1864     | 5.140   | 0.0388           |          |    |        |      |        |           |
| word class = verb : language = Dutch      | 0.1957      | 0.2094     | 0.930   | 0.0074           |          |    |        |      |        |           |
| word class = verb : language = English    | 0.0107      | 0.1894     | 0.060   | 0.0005           |          |    |        |      |        |           |
| word class = verb : language = Even       | 0.3130      | 0.1794     | 1.740   | 0.0133           |          |    |        |      |        |           |
| word class = verb : language = Hoocak     | 0.4499      | 0.2311     | 1.950   | 0.0151           |          |    |        |      |        |           |
| word class = verb : language = N  ng      | -0.2556     | 0.2180     | -1.170  | -0.0098          |          |    |        |      |        |           |
| word class = verb : language = Texistepec | 1.1452      | 0.2256     | 5.080   | 0.0402           |          |    |        |      |        |           |
| Random effect                             | Groups      | Std. Dev.  |         |                  | $\chi^2$ | df | p      | sig. | p (BH) | sig. (BH) |
| (1   speaker)                             | 310         | 1.7863     |         |                  | 1085.80  | 1  | <0.001 | ***  | <0.001 | ***       |
| (1   text)                                | 346         | 0.9018     |         |                  | 484.45   | 1  | <0.001 | ***  | <0.001 | ***       |
| (1   word type)                           | 29784       | 1.2211     |         |                  | 1838.80  | 1  | <0.001 | ***  | <0.001 | ***       |

**Table S10: Model predicting articulation rate in Baure**

| Fixed effect                 | Coefficient | Std. Error | t Value | Std. Coefficient | $\chi^2$ | df | p      | sig. | p (BH) | sig. (BH) |
|------------------------------|-------------|------------|---------|------------------|----------|----|--------|------|--------|-----------|
| (intercept)                  | 13.4844     | 0.3523     | 38.270  |                  |          |    |        |      |        |           |
| word class = verb            | 0.5952      | 0.3897     | 1.530   | 0.0593           | 13.00    | 2  | 0.002  | **   | 0.002  | **        |
| word length                  | 0.0252      | 0.1962     | 0.130   | 0.0047           | 5.22     | 2  | 0.074  | n.s. | 0.091  | n.s.      |
| position                     | -0.2806     | 0.3758     | -0.750  | -0.0176          | 1.26     | 3  | 0.738  | n.s. | 0.789  | n.s.      |
| word class = verb : position | 0.0243      | 0.4867     | 0.050   | 0.0020           | 0.00     | 1  | 0.959  | n.s. | 0.982  | n.s.      |
| word length : position       | 0.2347      | 0.2519     | 0.930   | 0.0344           | 0.87     | 1  | 0.352  | n.s. | 0.406  | n.s.      |
| Random effect                | Groups      | Std. Dev.  |         |                  | $\chi^2$ | df | p      | sig. | p (BH) | sig. (BH) |
| (1   speaker)                | 10          | 0.0000     |         |                  | 0.00     | 1  | 1.000  | n.s. | 1.000  | n.s.      |
| (1   text)                   | 37          | 0.8382     |         |                  | 56.00    | 1  | <0.001 | ***  | <0.001 | ***       |
| (1   word type)              | 2761        | 1.6110     |         |                  | 145.00   | 1  | <0.001 | ***  | <0.001 | ***       |

**Table S11: Model predicting articulation rate in Bora**

| Fixed effect                 | Coefficient | Std. Error | t Value | Std. Coefficient | $\chi^2$ | df | p      | sig. | p (BH) | sig. (BH) |
|------------------------------|-------------|------------|---------|------------------|----------|----|--------|------|--------|-----------|
| (intercept)                  | 17.3305     | 0.7375     | 23.498  |                  |          |    |        |      |        |           |
| word class = verb            | 0.1450      | 0.2895     | 0.501   | 0.0115           | 0.90     | 2  | 0.639  | n.s. | 0.697  | n.s.      |
| word length                  | 0.4135      | 0.1513     | 2.734   | 0.0632           | 60.27    | 2  | <0.001 | ***  | <0.001 | ***       |
| position                     | -0.4033     | 0.3329     | -1.211  | -0.0196          | 3.92     | 3  | 0.270  | n.s. | 0.320  | n.s.      |
| word class = verb : position | -0.0211     | 0.4111     | -0.051  | -0.0014          | 0.00     | 1  | 0.960  | n.s. | 0.982  | n.s.      |
| word length : position       | 0.2160      | 0.2064     | 1.046   | 0.0240           | 1.10     | 1  | 0.295  | n.s. | 0.345  | n.s.      |
| Random effect                | Groups      | Std. Dev.  |         |                  | $\chi^2$ | df | p      | sig. | p (BH) | sig. (BH) |
| (1 speaker)                  | 43          | 3.8930     |         |                  | 89.60    | 1  | <0.001 | ***  | <0.001 | ***       |
| (1 text)                     | 37          | 1.0380     |         |                  | 87.20    | 1  | <0.001 | ***  | <0.001 | ***       |
| (1 word type)                | 5002        | 1.6850     |         |                  | 103.30   | 1  | <0.001 | ***  | <0.001 | ***       |

**Table S12: Model predicting articulation rate in Chintang**

| Fixed effect                 | Coefficient | Std. Error | t Value | Std. Coefficient | $\chi^2$ | df | p      | sig. | p (BH) | sig. (BH) |
|------------------------------|-------------|------------|---------|------------------|----------|----|--------|------|--------|-----------|
| (intercept)                  | 16.1275     | 0.3750     | 43.000  |                  |          |    |        |      |        |           |
| word class = verb            | 1.3096      | 0.3188     | 4.110   | 0.1002           | 66.20    | 2  | <0.001 | ***  | <0.001 | ***       |
| word length                  | 0.2244      | 0.1713     | 1.310   | 0.0347           | 21.76    | 2  | <0.001 | ***  | <0.001 | ***       |
| position                     | -0.0450     | 0.3538     | -0.130  | -0.0020          | 0.62     | 3  | 0.892  | n.s. | 0.936  | n.s.      |
| word class = verb : position | -0.2059     | 0.4564     | -0.450  | -0.0134          | 0.20     | 1  | 0.652  | n.s. | 0.704  | n.s.      |
| word length : position       | 0.1268      | 0.2221     | 0.570   | 0.0158           | 0.33     | 1  | 0.568  | n.s. | 0.623  | n.s.      |
| Random effect                | Groups      | Std. Dev.  |         |                  | $\chi^2$ | df | p      | sig. | p (BH) | sig. (BH) |
| (1 speaker)                  | 68          | 1.6690     |         |                  | 169.10   | 1  | <0.001 | ***  | <0.001 | ***       |
| (1 text)                     | 40          | 0.9733     |         |                  | 31.40    | 1  | <0.001 | ***  | <0.001 | ***       |
| (1 word type)                | 4707        | 1.3520     |         |                  | 89.70    | 1  | <0.001 | ***  | <0.001 | ***       |

**Table S13: Model predicting articulation rate in Dutch**

| Fixed effect                 | Coefficient | Std. Error | t Value | Std. Coefficient | $\chi^2$ | df | p      | sig. | p (BH) | sig. (BH) |
|------------------------------|-------------|------------|---------|------------------|----------|----|--------|------|--------|-----------|
| (intercept)                  | 21.0532     | 0.5675     | 37.100  |                  |          |    |        |      |        |           |
| word class = verb            | 1.2707      | 0.4111     | 3.090   | 0.0848           | 9.65     | 2  | 0.008  | **   | 0.012  | *         |
| word length                  | -0.1204     | 0.1804     | -0.670  | -0.0190          | 7.59     | 2  | 0.022  | *    | 0.030  | *         |
| position                     | -0.3159     | 0.5108     | -0.620  | -0.0135          | 30.90    | 3  | <0.001 | ***  | <0.001 | ***       |
| word class = verb : position | -1.4302     | 0.5553     | -2.580  | -0.0718          | 6.62     | 1  | 0.010  | *    | 0.014  | *         |
| word length : position       | 0.4236      | 0.2365     | 1.790   | 0.0504           | 3.20     | 1  | 0.074  | n.s. | 0.091  | n.s.      |
| Random effect                | Groups      | Std. Dev.  |         |                  | $\chi^2$ | df | p      | sig. | p (BH) | sig. (BH) |
| (1 speaker)                  | 42          | 1.5840     |         |                  | 139.42   | 1  | <0.001 | ***  | <0.001 | ***       |
| (1 text)                     | 17          | 1.3790     |         |                  | 3.23     | 1  | 0.070  | n.s. | 0.090  | n.s.      |
| (1 word type)                | 2382        | 1.2750     |         |                  | 118.82   | 1  | <0.001 | ***  | <0.001 | ***       |

**Table S14: Model predicting articulation rate in English**

| Fixed effect                 | Coefficient | Std. Error | t Value | Std. Coefficient | $\chi^2$ | df | p      | sig. | p (BH) | sig. (BH) |
|------------------------------|-------------|------------|---------|------------------|----------|----|--------|------|--------|-----------|
| (intercept)                  | 18.9596     | 0.3558     | 53.290  |                  |          |    |        |      |        |           |
| word class = verb            | -0.3328     | 0.3085     | -1.080  | -0.0223          | 9.54     | 2  | 0.008  | **   | 0.012  | *         |
| word length                  | -0.2771     | 0.1462     | -1.900  | -0.0399          | 6.61     | 2  | 0.037  | *    | 0.048  | *         |
| position                     | -0.5736     | 0.3502     | -1.640  | -0.0230          | 11.09    | 3  | 0.011  | *    | 0.016  | *         |
| word class = verb : position | 1.0226      | 0.4158     | 2.460   | 0.0463           | 6.05     | 1  | 0.014  | *    | 0.018  | *         |
| word length : position       | 0.4879      | 0.1936     | 2.520   | 0.0493           | 6.35     | 1  | 0.012  | *    | 0.016  | *         |
| Random effect                | Groups      | Std. Dev.  |         |                  | $\chi^2$ | df | p      | sig. | p (BH) | sig. (BH) |
| (1 speaker)                  | 80          | 1.7826     |         |                  | 339.10   | 1  | <0.001 | ***  | <0.001 | ***       |
| (1 text)                     | 47          | 0.7756     |         |                  | 12.30    | 1  | <0.001 | ***  | <0.001 | ***       |
| (1 word type)                | 2783        | 1.5932     |         |                  | 846.20   | 1  | <0.001 | ***  | <0.001 | ***       |

**Table S15: Model predicting articulation rate in Even**

| Fixed effect                 | Coefficient | Std. Error | t Value | Std. Coefficient | $\chi^2$ | df | p      | sig. | p (BH) | sig. (BH) |
|------------------------------|-------------|------------|---------|------------------|----------|----|--------|------|--------|-----------|
| (intercept)                  | 14.1926     | 0.2707     | 52.440  |                  |          |    |        |      |        |           |
| word class = verb            | 0.5619      | 0.1591     | 3.530   | 0.0725           | 46.66    | 2  | <0.001 | ***  | <0.001 | ***       |
| word length                  | 0.3132      | 0.0878     | 3.570   | 0.0735           | 36.71    | 2  | <0.001 | ***  | <0.001 | ***       |
| position                     | 0.3605      | 0.1792     | 2.010   | 0.0282           | 7.59     | 3  | 0.055  | n.s. | 0.071  | n.s.      |
| word class = verb : position | -0.0339     | 0.2278     | -0.150  | -0.0154          | 0.02     | 1  | 0.882  | n.s. | 0.930  | n.s.      |
| word length : position       | -0.0919     | 0.1235     | -0.740  | -0.0036          | 0.56     | 1  | 0.456  | n.s. | 0.511  | n.s.      |
| Random effect                | Groups      | Std. Dev.  |         |                  | $\chi^2$ | df | p      | sig. | p (BH) | sig. (BH) |
| (1 speaker)                  | 31          | 1.1312     |         |                  | 59.90    | 1  | <0.001 | ***  | <0.001 | ***       |
| (1 text)                     | 67          | 0.7574     |         |                  | 161.90   | 1  | <0.001 | ***  | <0.001 | ***       |
| (1 word type)                | 5720        | 1.0066     |         |                  | 63.40    | 1  | <0.001 | ***  | <0.001 | ***       |

**Table S16: Model predicting articulation rate in Hoocak**

| Fixed effect                 | Coefficient | Std. Error | t Value | Std. Coefficient | $\chi^2$ | df | p      | sig. | p (BH) | sig. (BH) |
|------------------------------|-------------|------------|---------|------------------|----------|----|--------|------|--------|-----------|
| (intercept)                  | 12.1449     | 0.4654     | 26.094  |                  |          |    |        |      |        |           |
| word class = verb            | 0.4952      | 0.2545     | 1.946   | 0.0505           | 18.77    | 2  | <0.001 | ***  | <0.001 | ***       |
| word length                  | 0.0056      | 0.1221     | 0.046   | 0.0013           | 1.83     | 2  | 0.401  | n.s. | 0.458  | n.s.      |
| position                     | 0.6635      | 0.3684     | 1.801   | 0.0459           | 23.14    | 3  | <0.001 | ***  | <0.001 | ***       |
| word class = verb : position | 0.1628      | 0.4220     | 0.386   | 0.0144           | 0.15     | 1  | 0.700  | n.s. | 0.753  | n.s.      |
| word length : position       | 0.1001      | 0.1711     | 0.585   | 0.0170           | 0.34     | 1  | 0.558  | n.s. | 0.615  | n.s.      |
| Random effect                | Groups      | Std. Dev.  |         |                  | $\chi^2$ | df | p      | sig. | p (BH) | sig. (BH) |
| (1 speaker)                  | 28          | 1.8185     |         |                  | 43.90    | 1  | <0.001 | ***  | <0.001 | ***       |
| (1 text)                     | 62          | 1.2311     |         |                  | 166.50   | 1  | <0.001 | ***  | <0.001 | ***       |
| (1 word type)                | 3209        | 0.9049     |         |                  | 33.10    | 1  | <0.001 | ***  | <0.001 | ***       |

**Table S17: Model predicting articulation rate in Nlɪŋg**

| Fixed effect                 | Coefficient | Std. Error | t Value | Std. Coefficient | $\chi^2$ | df | p      | sig. | p (BH) | sig. (BH) |
|------------------------------|-------------|------------|---------|------------------|----------|----|--------|------|--------|-----------|
| (intercept)                  | 16.9507     | 0.8685     | 19.517  |                  |          |    |        |      |        |           |
| word class = verb            | 0.1444      | 0.4833     | 0.299   | 0.0106           | 1.27     | 2  | 0.529  | n.s. | 0.587  | n.s.      |
| word length                  | 0.3221      | 0.2710     | 1.189   | 0.0437           | 7.48     | 2  | 0.024  | *    | 0.032  | *         |
| position                     | -1.1214     | 0.5352     | -2.095  | -0.0486          | 33.63    | 3  | <0.001 | ***  | <0.001 | ***       |
| word class = verb : position | -0.3811     | 0.5577     | -0.683  | -0.0244          | 0.47     | 1  | 0.493  | n.s. | 0.550  | n.s.      |
| word length : position       | -0.0472     | 0.3045     | -0.155  | -0.0057          | 0.02     | 1  | 0.876  | n.s. | 0.928  | n.s.      |
| Random effect                | Groups      | Std. Dev.  |         |                  | $\chi^2$ | df | p      | sig. | p (BH) | sig. (BH) |
| (1 speaker)                  | 7           | 1.8140     |         |                  | 41.50    | 1  | <0.001 | ***  | <0.001 | ***       |
| (1 text)                     | 33          | 1.2300     |         |                  | 222.80   | 1  | <0.001 | ***  | <0.001 | ***       |
| (1 word type)                | 1097        | 1.2610     |         |                  | 101.20   | 1  | <0.001 | ***  | <0.001 | ***       |

**Table S18: Model predicting articulation rate in Texistepec**

| Fixed effect                 | Coefficient | Std. Error | t Value | Std. Coefficient | $\chi^2$ | df | p      | sig. | p (BH) | sig. (BH) |
|------------------------------|-------------|------------|---------|------------------|----------|----|--------|------|--------|-----------|
| (intercept)                  | 17.4141     | 0.4647     | 37.470  |                  |          |    |        |      |        |           |
| word class = verb            | 3.7737      | 0.5112     | 7.380   | 0.2616           | 62.76    | 2  | <0.001 | ***  | <0.001 | ***       |
| word length                  | 0.5646      | 0.2131     | 2.650   | 0.0904           | 10.69    | 2  | 0.005  | **   | 0.007  | **        |
| position                     | 0.8543      | 0.5302     | 1.610   | 0.0355           | 68.91    | 3  | <0.001 | ***  | <0.001 | ***       |
| word class = verb : position | -3.3974     | 0.6300     | -5.390  | -0.1968          | 28.92    | 1  | <0.001 | ***  | <0.001 | ***       |
| word length : position       | -0.4325     | 0.2733     | -1.580  | -0.0534          | 2.52     | 1  | 0.113  | n.s. | 0.136  | n.s.      |
| Random effect                | Groups      | Std. Dev.  |         |                  | $\chi^2$ | df | p      | sig. | p (BH) | sig. (BH) |
| (1 text)                     | 6           | 0.3474     |         |                  | 7.69     | 1  | 0.006  | **   | 0.008  | **        |
| (1 word type)                | 2123        | 1.8003     |         |                  | 113.56   | 1  | <0.001 | ***  | <0.001 | ***       |

**Table S19: Comparison of models for predicting articulation rate (incl. auxiliaries) in all nine languages**

| Step               | Fixed effects structure                                                                                                                    | Added                  | AIC     | $\chi^2$ | df | p      | sig. |
|--------------------|--------------------------------------------------------------------------------------------------------------------------------------------|------------------------|---------|----------|----|--------|------|
| <b>1 (initial)</b> | word class + language + word class:language                                                                                                |                        | 598 231 |          |    |        |      |
| <b>2a</b>          | word class + word length + language + word class:language                                                                                  | word length            | 598 155 | 78.22    | 1  | <0.001 | ***  |
| 2b                 | word class + position + language + word class:language                                                                                     | position               | 598 221 | 12.40    | 1  | <0.001 | ***  |
| <b>3a</b>          | word class + word length + position + language + word class:language                                                                       | position               | 598 140 | 17.08    | 1  | <0.001 | ***  |
| 3b                 | word class + word length + word class:word length + language + word class:language                                                         | word class:word length | 598 157 | 0.17     | 1  | 0.678  | n.s. |
| 4a                 | word class + word length + position + word class:word length + language + word class:language                                              | word class:word length | 598 142 | 0.30     | 1  | 0.586  | n.s. |
| <b>4b</b>          | word class + word length + position + word class:position + language + word class:language                                                 | word class:position    | 598 134 | 8.14     | 1  | 0.004  | **   |
| 4c                 | word class + word length + position + word length:position + language + word class:language                                                | word length:position   | 598 135 | 7.40     | 1  | 0.007  | **   |
| 5a                 | word class + word length + position + word class:word length + word class:position + language + word class:language                        | word class:word length | 598 135 | 0.48     | 1  | 0.488  | n.s. |
| <b>5b (final)</b>  | word class + word length + position + word class:position + word length:position + language + word class:language                          | word length:position   | 598 129 | 6.60     | 1  | 0.010  | *    |
| 6                  | word class + word length + position + word class:word length + word class:position + word length:position + language + word class:language | word class:word length | 598 131 | 0.38     | 1  | 0.538  | n.s. |

Notes: Alternative models are given the same step number followed by different letters. The model structure chosen as the next step is marked in bold.



**Table S20: Model predicting articulation rate (incl. auxiliaries) in all nine languages**

| Fixed effect                              | Coefficient   | Std. Error       | t Value | Std. Coefficient | $\chi^2$ | df | p      | sig. | p (BH) | sig. (BH) |                            |           |          |             |               |                  |
|-------------------------------------------|---------------|------------------|---------|------------------|----------|----|--------|------|--------|-----------|----------------------------|-----------|----------|-------------|---------------|------------------|
| (intercept)                               | 16.9820       | 0.4247           | 39.990  |                  |          |    |        |      |        |           |                            |           |          |             |               |                  |
| word class = verb                         | 0.5295        | 0.1601           | 3.310   | 0.0384           | 224.61   | 10 | <0.001 | ***  | <0.001 | ***       |                            |           |          |             |               |                  |
| word length                               | 0.1052        | 0.0515           | 2.040   | 0.0162           | 90.73    | 2  | <0.001 | ***  | <0.001 | ***       |                            |           |          |             |               |                  |
| position                                  | -0.1175       | 0.1248           | -0.940  | -0.0053          | 31.82    | 3  | <0.001 | ***  | <0.001 | ***       |                            |           |          |             |               |                  |
| language = Baure                          | -3.7640       | 0.7928           | -4.750  | -0.1351          | 294.48   | 16 | <0.001 | ***  |        |           |                            |           |          |             |               |                  |
| language = Chintang                       | -0.7646       | 0.5243           | -1.460  | -0.0375          |          |    |        |      |        |           |                            |           |          |             |               |                  |
| language = Dutch                          | 3.9426        | 0.5650           | 6.980   | 0.1788           |          |    |        |      |        |           |                            |           |          |             |               |                  |
| language = English                        | 1.4978        | 0.4910           | 3.050   | 0.0914           |          |    |        |      |        |           |                            |           |          |             |               |                  |
| language = Even                           | -2.4481       | 0.5632           | -4.350  | -0.1300          |          |    |        |      |        |           |                            |           |          |             |               |                  |
| language = Hoocak                         | -4.5612       | 0.5997           | -7.610  | -0.1869          |          |    |        |      |        |           |                            |           |          |             |               |                  |
| language = Nlɨŋg                          | -0.8674       | 0.8306           | -1.040  | -0.0388          |          |    |        |      |        |           |                            |           |          |             |               |                  |
| language = Texistepec                     | 1.0737        | 1.8862           | 0.570   | 0.0465           |          |    |        |      |        |           |                            |           |          |             |               |                  |
| word class = verb : position              | -0.3946       | 0.1456           | -2.710  | -0.0231          |          |    |        |      |        |           | 7.34                       | 1         | 0.007    | **          | 0.010         | *                |
| word length : position                    | 0.1733        | 0.0675           | 2.570   | 0.0199           |          |    |        |      |        |           | 6.60                       | 1         | 0.010    | *           | 0.014         | *                |
| word class = verb : language = Baure      | 0.2472        | 0.2256           | 1.100   | 0.0071           | 65.00    | 8  | <0.001 | ***  | <0.001 | ***       |                            |           |          |             |               |                  |
| word class = verb : language = Chintang   | 0.9538        | 0.1860           | 5.130   | 0.0376           |          |    |        |      |        |           |                            |           |          |             |               |                  |
| word class = verb : language = Dutch      | 0.1808        | 0.2086           | 0.870   | 0.0066           |          |    |        |      |        |           |                            |           |          |             |               |                  |
| word class = verb : language = English    | 0.0506        | 0.1870           | 0.270   | 0.0026           |          |    |        |      |        |           |                            |           |          |             |               |                  |
| word class = verb : language = Even       | 0.3537        | 0.1783           | 1.980   | 0.0150           |          |    |        |      |        |           |                            |           |          |             |               |                  |
| word class = verb : language = Hoocak     | 0.4839        | 0.2258           | 2.140   | 0.0177           |          |    |        |      |        |           |                            |           |          |             |               |                  |
| word class = verb : language = Nlɨŋg      | -0.2585       | 0.2170           | -1.190  | -0.0096          |          |    |        |      |        |           |                            |           |          |             |               |                  |
| word class = verb : language = Texistepec | 1.0986        | 0.2237           | 4.910   | 0.0416           |          |    |        |      |        |           |                            |           |          |             |               |                  |
| <b>Random effect</b>                      | <b>Groups</b> | <b>Std. Dev.</b> |         |                  |          |    |        |      |        |           | <b><math>\chi^2</math></b> | <b>df</b> | <b>p</b> | <b>sig.</b> | <b>p (BH)</b> | <b>sig. (BH)</b> |
| (1 speaker)                               | 310           | 1.7932           |         |                  |          |    |        |      |        |           | 164.20                     | 1         | <0.001   | ***         | <0.001        | ***              |
| (1 text)                                  | 346           | 0.8994           |         |                  | 497.73   | 1  | <0.001 | ***  | <0.001 | ***       |                            |           |          |             |               |                  |
| (1 word type)                             | 30526         | 1.1798           |         |                  | 808.80   | 1  | <0.001 | ***  | <0.001 | ***       |                            |           |          |             |               |                  |

**Table S21: Model predicting articulation rate (incl. auxiliaries) in English**

| Fixed effect                 | Coefficient   | Std. Error       | t Value | Std. Coefficient | $\chi^2$                   | df        | p        | sig.        | p (BH)        | sig. (BH)        |
|------------------------------|---------------|------------------|---------|------------------|----------------------------|-----------|----------|-------------|---------------|------------------|
| (intercept)                  | 19.0318       | 0.3562           | 53.430  |                  |                            |           |          |             |               |                  |
| word class = verb            | -0.2910       | 0.3064           | -0.950  | -0.0190          | 10.35                      | 2         | 0.006    | **          | 0.008         | **               |
| word length                  | -0.3498       | 0.1389           | -2.520  | -0.0524          | 10.16                      | 2         | 0.006    | **          | 0.009         | **               |
| position                     | -0.6450       | 0.3463           | -1.860  | -0.0257          | 13.00                      | 3         | 0.005    | **          | 0.007         | **               |
| word class = verb : position | 1.0075        | 0.4133           | 2.440   | 0.0449           | 5.94                       | 1         | 0.015    | *           | 0.020         | *                |
| word length : position       | 0.5796        | 0.1827           | 3.170   | 0.0585           | 10.07                      | 1         | 0.002    | **          | 0.002         | **               |
| <b>Random effect</b>         | <b>Groups</b> | <b>Std. Dev.</b> |         |                  | <b><math>\chi^2</math></b> | <b>df</b> | <b>p</b> | <b>sig.</b> | <b>p (BH)</b> | <b>sig. (BH)</b> |
| (1 speaker)                  | 80            | 1.8269           |         |                  | 388.30                     | 1         | <0.001   | ***         | <0.001        | ***              |
| (1 text)                     | 47            | 0.7707           |         |                  | 13.10                      | 1         | <0.001   | ***         | <0.001        | ***              |
| (1 word type)                | 2794          | 1.5689           |         |                  | 843.40                     | 1         | <0.001   | ***         | <0.001        | ***              |

**Table S22: Model predicting articulation rate (incl. auxiliaries) in Even**

| Fixed effect                 | Coefficient | Std. Error | t Value | Std. Coefficient | $\chi^2$ | df | p      | sig. | p (BH) | sig. (BH) |
|------------------------------|-------------|------------|---------|------------------|----------|----|--------|------|--------|-----------|
| (intercept)                  | 14.2215     | 0.2754     | 51.650  |                  |          |    |        |      |        |           |
| word class = verb            | 0.6000      | 0.1569     | 3.830   | 0.0767           | 55.37    | 2  | <0.001 | ***  | <0.001 | ***       |
| word length                  | 0.2954      | 0.0859     | 3.440   | 0.0696           | 30.53    | 2  | <0.001 | ***  | <0.001 | ***       |
| position                     | 0.3710      | 0.1793     | 2.070   | 0.0288           | 8.55     | 3  | 0.036  | *    | 0.047  | *         |
| word class = verb : position | -0.0222     | 0.2251     | -0.100  | -0.0023          | 0.01     | 1  | 0.922  | n.s. | 0.957  | n.s.      |
| word length : position       | -0.1093     | 0.1208     | -0.910  | -0.0184          | 0.82     | 1  | 0.365  | n.s. | 0.420  | n.s.      |
| Random effect                | Groups      | Std. Dev.  |         |                  | $\chi^2$ | df | p      | sig. | p (BH) | sig. (BH) |
| (1 speaker)                  | 31          | 1.1630     |         |                  | 67.40    | 1  | <0.001 | ***  | <0.001 | ***       |
| (1 text)                     | 67          | 0.7590     |         |                  | 163.30   | 1  | <0.001 | ***  | <0.001 | ***       |
| (1 word type)                | 5787        | 1.0230     |         |                  | 82.10    | 1  | <0.001 | ***  | <0.001 | ***       |

**Table S23: Model predicting articulation rate (incl. auxiliaries) in Hoocak**

| Fixed effect                 | Coefficient | Std. Error | t Value | Std. Coefficient | $\chi^2$ | df | p      | sig. | p (BH) | sig. (BH) |
|------------------------------|-------------|------------|---------|------------------|----------|----|--------|------|--------|-----------|
| (intercept)                  | 12.0592     | 0.4422     | 27.273  |                  |          |    |        |      |        |           |
| word class = verb            | 0.6778      | 0.2414     | 2.808   | 0.0664           | 26.31    | 2  | <0.001 | ***  | <0.001 | ***       |
| word length                  | 0.0740      | 0.1112     | 0.666   | 0.0176           | 1.74     | 2  | 0.418  | n.s. | 0.475  | n.s.      |
| position                     | 0.6756      | 0.3604     | 1.875   | 0.0479           | 15.65    | 3  | 0.001  | **   | 0.002  | **        |
| word class = verb : position | -0.0516     | 0.4036     | -0.128  | -0.0046          | 0.02     | 1  | 0.898  | n.s. | 0.937  | n.s.      |
| word length : position       | -0.0115     | 0.1526     | -0.076  | -0.0021          | 0.01     | 1  | 0.941  | n.s. | 0.972  | n.s.      |
| Random effect                | Groups      | Std. Dev.  |         |                  | $\chi^2$ | df | p      | sig. | p (BH) | sig. (BH) |
| (1 speaker)                  | 28          | 1.7133     |         |                  | 59.50    | 1  | <0.001 | ***  | <0.001 | ***       |
| (1 text)                     | 62          | 1.1718     |         |                  | 212.60   | 1  | <0.001 | ***  | <0.001 | ***       |
| (1 word type)                | 3843        | 0.8674     |         |                  | 36.20    | 1  | <0.001 | ***  | <0.001 | ***       |

**Table S24: Model predicting articulation rate (incl. auxiliaries) in Texistepec**

| Fixed effect                 | Coefficient | Std. Error | t Value | Std. Coefficient | $\chi^2$ | df | p      | sig. | p (BH) | sig. (BH) |
|------------------------------|-------------|------------|---------|------------------|----------|----|--------|------|--------|-----------|
| (intercept)                  | 17.4430     | 0.4674     | 37.320  |                  |          |    |        |      |        |           |
| word class = verb            | 3.7716      | 0.5036     | 7.490   | 0.2461           | 62.99    | 2  | <0.001 | ***  | <0.001 | ***       |
| word length                  | 0.4991      | 0.1990     | 2.510   | 0.0812           | 12.94    | 2  | 0.002  | **   | 0.002  | **        |
| position                     | 0.7799      | 0.5374     | 1.450   | 0.0321           | 77.30    | 3  | <0.001 | ***  | <0.001 | ***       |
| word class = verb : position | -3.5040     | 0.6231     | -5.620  | -0.1896          | 31.47    | 1  | <0.001 | ***  | <0.001 | ***       |
| word length : position       | -0.2839     | 0.2560     | -1.110  | -0.0342          | 1.24     | 1  | 0.265  | n.s. | 0.315  | n.s.      |
| Random effect                | Groups      | Std. Dev.  |         |                  | $\chi^2$ | df | p      | sig. | p (BH) | sig. (BH) |
| (1 text)                     | 6           | 0.3438     |         |                  | 8.67     | 1  | 0.003  | **   | 0.005  | **        |
| (1 word type)                | 2153        | 1.6288     |         |                  | 100.99   | 1  | <0.001 | ***  | <0.001 | ***       |

**Table S25: Size of word class effect on articulation rate**

| language                      | predicted articulation rate difference (nouns vs. verbs) |                          |                                |                          |
|-------------------------------|----------------------------------------------------------|--------------------------|--------------------------------|--------------------------|
|                               | auxiliaries excluded                                     |                          | auxiliaries included           |                          |
|                               | at the beginning of utterances                           | at the end of utterances | at the beginning of utterances | at the end of utterances |
| Baure                         | -0.5967                                                  | -0.6195                  |                                |                          |
| Bora                          | -0.1445                                                  | -0.1239                  |                                |                          |
| Chintang                      | -1.2982                                                  | -1.1037                  |                                |                          |
| Dutch                         | -1.2582                                                  | 0.1595                   |                                |                          |
| English                       | 0.3136                                                   | -0.6897                  | 0.2720                         | -0.7165                  |
| Even                          | -0.5613                                                  | -0.5280                  | -0.5996                        | -0.5779                  |
| Hoocak                        | -0.4970                                                  | -0.6580                  | -0.6772                        | -0.6262                  |
| N ng                          | -0.1254                                                  | 0.2367                   |                                |                          |
| Texistepec                    | -3.5472                                                  | -0.3763                  | -3.5872                        | -0.2676                  |
| <b>grand mean<sup>a</sup></b> | <b>-0.8572</b>                                           | <b>-0.4114</b>           | <b>-0.8906</b>                 | <b>-0.4043</b>           |

Note: <sup>a</sup> We averaged across all nine languages, both when excluding and when including auxiliaries. We did, however, not repeat unchanged results in the *auxiliaries included* columns.

**Table S26: Data preparation for main study pause probability (excl. known auxiliaries)**

| Language   | Word Class | Initial Contexts | Contexts Left After Excluding                             |                                      |                   |                                               |                         | Excluded relevant target words (N and V) |
|------------|------------|------------------|-----------------------------------------------------------|--------------------------------------|-------------------|-----------------------------------------------|-------------------------|------------------------------------------|
|            |            |                  | Target words of other classes (than N and V) <sup>a</sup> | Target words with both N and V roots | First words in AU | Disfluencies or filled pauses as target words | Contexts of length zero |                                          |
| Baure      | All        | 17 652           | 7 917                                                     | 7 843                                | 6 474             | 6 474                                         | 6 364                   | 19.62 %                                  |
|            | N          | 2 778            | 2 778                                                     | 2 704                                | 2 454             | 2 454                                         | 2 427                   | 12.63 %                                  |
|            | V          | 5 213            | 5 213                                                     | 5 139                                | 4 020             | 4 020                                         | 3 937                   | 24.48 %                                  |
| Bora       | All        | 29 802           | 14 181                                                    | 14 180                               | 13 476            | 13 472                                        | 13 316                  | 6.10 %                                   |
|            | N          | 5 913            | 5 913                                                     | 5 912                                | 5 566             | 5 566                                         | 5 507                   | 6.87 %                                   |
|            | V          | 8 269            | 8 269                                                     | 8 268                                | 7 910             | 7 906                                         | 7 809                   | 5.56 %                                   |
| Chintang   | All        | 37 737           | 15 263                                                    | 15 260                               | 12 364            | 12 347                                        | 12 283                  | 19.52 %                                  |
|            | N          | 6 607            | 6 607                                                     | 6 604                                | 4 985             | 4 969                                         | 4 942                   | 25.20 %                                  |
|            | V          | 8 659            | 8 659                                                     | 8 656                                | 7 379             | 7 378                                         | 7 341                   | 15.22 %                                  |
| Dutch      | All        | 39 519           | 10 660                                                    | 10 660                               | 10 164            | 10 164                                        | 10 147                  | 4.81 %                                   |
|            | N          | 3 973            | 3 973                                                     | 3 973                                | 3 863             | 3 863                                         | 3 853                   | 3.02 %                                   |
|            | V          | 6 687            | 6 687                                                     | 6 687                                | 6 301             | 6 301                                         | 6 294                   | 5.88 %                                   |
| English    | All        | 56 135           | 18 677                                                    | 18 674                               | 18 315            | 18 294                                        | 18 282                  | 2.11 %                                   |
|            | N          | 7 777            | 7 777                                                     | 7 774                                | 7 542             | 7 521                                         | 7 516                   | 3.36 %                                   |
|            | V          | 10 903           | 10 903                                                    | 10 900                               | 10 773            | 10 773                                        | 10 766                  | 1.26 %                                   |
| Even       | All        | 37 430           | 18 378                                                    | 18 378                               | 17 215            | 17 129                                        | 17 017                  | 7.41 %                                   |
|            | N          | 8 835            | 8 835                                                     | 8 835                                | 7 980             | 7 948                                         | 7 892                   | 10.67 %                                  |
|            | V          | 9 543            | 9 543                                                     | 9 543                                | 9 235             | 9 181                                         | 9 125                   | 4.38 %                                   |
| Hooçak     | All        | 23 191           | 9 954                                                     | 9 821                                | 9 149             | 9 149                                         | 8 825                   | 11.34 %                                  |
|            | N          | 3 683            | 3 670                                                     | 3 537                                | 3 091             | 3 091                                         | 2 968                   | 19.13 %                                  |
|            | V          | 6 903            | 6 417                                                     | 6 284                                | 6 058             | 6 058                                         | 5 857                   | 8.73 %                                   |
| N  ng      | All        | 26 061           | 11 881                                                    | 11 881                               | 9 724             | 9 630                                         | 9 619                   | 19.04 %                                  |
|            | N          | 4 415            | 4 415                                                     | 4 415                                | 3 336             | 3 296                                         | 3 290                   | 25.48 %                                  |
|            | V          | 7 466            | 7 466                                                     | 7 466                                | 6 388             | 6 334                                         | 6 329                   | 15.23 %                                  |
| Texistepec | All        | 21 321           | 8 866                                                     | 8 723                                | 7 603             | 7 595                                         | 7 586                   | 14.44 %                                  |
|            | N          | 2 738            | 2 738                                                     | 2 595                                | 2 393             | 2 386                                         | 2 382                   | 13.00 %                                  |
|            | V          | 6 272            | 6 271                                                     | 6 128                                | 5 210             | 5 209                                         | 5 204                   | 17.01 %                                  |
| Overall    | All        | <b>288 848</b>   | <b>115 777</b>                                            | <b>115 420</b>                       | <b>104 484</b>    | <b>104 254</b>                                | <b>103 439</b>          | <b>10.66 %</b>                           |
|            | N          | <b>46 719</b>    | <b>46 706</b>                                             | <b>46 349</b>                        | <b>41 210</b>     | <b>41 094</b>                                 | <b>40 777</b>           | <b>12.69 %</b>                           |
|            | V          | <b>69 915</b>    | <b>69 428</b>                                             | <b>69 071</b>                        | <b>63 274</b>     | <b>63 160</b>                                 | <b>62 662</b>           | <b>9.75 %</b>                            |

Note: <sup>a</sup> Since words can contain multiple roots of different word class categories, the respective *N* and *V* rows in this column (column 4) do not necessarily sum exactly to the value in the respective *All* row. This is, however, the case for the remainder of the columns after excluding target words containing both N and V roots in column 5. (AU = annotation unit)

**Table S27: Data preparation for alternative study pause probability (incl. auxiliaries)**

| Language   | Word Class       | Initial Contexts | Contexts Left After Excluding                                   |                                      |                   |                                               |                         | Excluded relevant target words (N, V, and AUX) |
|------------|------------------|------------------|-----------------------------------------------------------------|--------------------------------------|-------------------|-----------------------------------------------|-------------------------|------------------------------------------------|
|            |                  |                  | Target words of other classes (than N, V, and AUX) <sup>a</sup> | Target words with both N and V roots | First words in AU | Disfluencies or filled pauses as target words | Contexts of length zero |                                                |
| Baure      | All              | 17 652           | 7 917                                                           | 7 843                                | 6 474             | 6 474                                         | 6 364                   | 19.62 %                                        |
|            | N                | 2 778            | 2 778                                                           | 2 704                                | 2 454             | 2 454                                         | 2 427                   | 12.63 %                                        |
|            | V                | 5 213            | 5 213                                                           | 5 139                                | 4 020             | 4 020                                         | 3 937                   | 24.48 %                                        |
| Bora       | All              | 29 802           | 14 181                                                          | 14 180                               | 13 476            | 13 472                                        | 13 316                  | 6.10 %                                         |
|            | N                | 5 913            | 5 913                                                           | 5 912                                | 5 566             | 5 566                                         | 5 507                   | 6.87 %                                         |
|            | V                | 8 269            | 8 269                                                           | 8 268                                | 7 910             | 7 906                                         | 7 809                   | 5.56 %                                         |
| Chintang   | All              | 37 737           | 15 263                                                          | 15 260                               | 12 364            | 12 347                                        | 12 283                  | 19.52 %                                        |
|            | N                | 6 607            | 6 607                                                           | 6 604                                | 4 985             | 4 969                                         | 4 942                   | 25.20 %                                        |
|            | V                | 8 659            | 8 659                                                           | 8 656                                | 7 379             | 7 378                                         | 7 341                   | 15.22 %                                        |
| Dutch      | All              | 39 519           | 10 660                                                          | 10 660                               | 10 164            | 10 164                                        | 10 147                  | 4.81 %                                         |
|            | N                | 3 973            | 3 973                                                           | 3 973                                | 3 863             | 3 863                                         | 3 853                   | 3.02 %                                         |
|            | V                | 6 687            | 6 687                                                           | 6 687                                | 6 301             | 6 301                                         | 6 294                   | 5.88 %                                         |
| English    | All              | 56 135           | 20 551                                                          | 20 548                               | 20 185            | 20 161                                        | 20 149                  | 1.96 %                                         |
|            | N                | 7 777            | 7 777                                                           | 7 774                                | 7 542             | 7 521                                         | 7 516                   | 3.36 %                                         |
|            | V                | 10 903           | 10 903                                                          | 10 900                               | 10 773            | 10 773                                        | 10 766                  | 1.26 %                                         |
|            | AUX <sup>b</sup> | 1 874            | 1 874                                                           | 1 874                                | 1 870             | 1 867                                         | 1 867                   | 0.37 %                                         |
| Even       | All              | 37 430           | 19 003                                                          | 19 003                               | 17 788            | 17 700                                        | 17 588                  | 7.45 %                                         |
|            | N                | 8 835            | 8 835                                                           | 8 835                                | 7 980             | 7 948                                         | 7 892                   | 10.67 %                                        |
|            | V                | 9 543            | 9 543                                                           | 9 543                                | 9 235             | 9 181                                         | 9 125                   | 4.38 %                                         |
|            | AUX <sup>b</sup> | 625              | 625                                                             | 625                                  | 573               | 571                                           | 571                     | 8.64 %                                         |
| Hooçak     | All              | 23 191           | 11 504                                                          | 11 358                               | 10 647            | 10 647                                        | 10 263                  | 10.79 %                                        |
|            | N                | 3 683            | 3 683                                                           | 3 537                                | 3 091             | 3 091                                         | 2 968                   | 19.41 %                                        |
|            | V                | 6 903            | 6 903                                                           | 6 770                                | 6 531             | 6 531                                         | 6 314                   | 8.53 %                                         |
|            | AUX <sup>b</sup> | 1 064            | 1 064                                                           | 1 051                                | 1 025             | 1 025                                         | 981                     | 7.80 %                                         |
| N ng       | All              | 26 061           | 11 881                                                          | 11 881                               | 9 724             | 9 630                                         | 9 619                   | 19.04 %                                        |
|            | N                | 4 415            | 4 415                                                           | 4 415                                | 3 336             | 3 296                                         | 3 290                   | 25.48 %                                        |
|            | V                | 7 466            | 7 466                                                           | 7 466                                | 6 388             | 6 334                                         | 6 329                   | 15.23 %                                        |
| Texistepec | All              | 21 321           | 10 916                                                          | 10 773                               | 8 959             | 8 948                                         | 8 939                   | 18.11 %                                        |
|            | N                | 2 738            | 2 738                                                           | 2 595                                | 2 393             | 2 386                                         | 2 382                   | 13.00 %                                        |
|            | V                | 6 272            | 6 272                                                           | 6 129                                | 5 211             | 5 210                                         | 5 205                   | 17.01 %                                        |
|            | AUX <sup>b</sup> | 2 049            | 2 049                                                           | 2 049                                | 1 355             | 1 352                                         | 1 352                   | 34.02 %                                        |
| Overall    | All              | <b>288 848</b>   | <b>121 876</b>                                                  | <b>121 506</b>                       | <b>109 781</b>    | <b>109 543</b>                                | <b>108 668</b>          | <b>10.84 %</b>                                 |
|            | N                | <b>46 719</b>    | <b>46 719</b>                                                   | <b>46 349</b>                        | <b>41 210</b>     | <b>41 094</b>                                 | <b>40 777</b>           | <b>12.72 %</b>                                 |
|            | V                | <b>69 915</b>    | <b>69 915</b>                                                   | <b>69 558</b>                        | <b>63 748</b>     | <b>63 634</b>                                 | <b>63 120</b>           | <b>9.72 %</b>                                  |
|            | AUX <sup>b</sup> | <b>5 612</b>     | <b>5 612</b>                                                    | <b>5 599</b>                         | <b>4 823</b>      | <b>4 815</b>                                  | <b>4 771</b>            | <b>14.99 %</b>                                 |

Notes: <sup>a</sup> Since words can contain multiple roots of different word class categories, the respective *N* and *V* rows in this column (column 4) do not necessarily sum exactly to the value in the respective *All* row. This is, however, the case for the remainder of the columns after excluding target words containing both *N* and *V* roots in column 5. <sup>b</sup> Words containing both a *V* root and an *AUX* root will be counted as *V* in this table. Words containing only an *AUX* root but no *V* root are counted as auxiliaries. Words containing both a *V* root and an *AUX* root will still only enter as one observation into the statistical analyses. (AU = annotation unit)

**Table S28: Summary statistics of pause probability by language**

| Language   | Variant   | All pauses    |               |                  |                   | Silent pauses |               |                  |                   | Filled pauses |               |                  |                   |
|------------|-----------|---------------|---------------|------------------|-------------------|---------------|---------------|------------------|-------------------|---------------|---------------|------------------|-------------------|
|            |           | Count         | Est. prob.    | Conf. int. lower | Conf. int. higher | Count         | Est. prob.    | Conf. int. lower | Conf. int. higher | Count         | Est. prob.    | Conf. int. lower | Conf. int. higher |
| Baure      |           | 1 022         | 0.1606        | 0.1517           | 0.1698            | 934           | 0.1468        | 0.1382           | 0.1556            | 115           | 0.0181        | 0.0150           | 0.0216            |
| Bora       |           | 4 093         | 0.3074        | 0.2996           | 0.3153            | 4 069         | 0.3056        | 0.2978           | 0.3.35            | 57            | 0.0043        | 0.0033           | 0.0055            |
| Chintang   |           | 1 701         | 0.1385        | 0.1325           | 0.1447            | 1 531         | 0.1246        | 0.1189           | 0.1306            | 197           | 0.0160        | 0.0139           | 0.0184            |
| Dutch      |           | 1 301         | 0.1282        | 0.1218           | 0.1348            | 890           | 0.0877        | 0.0823           | 0.0933            | 459           | 0.0452        | 0.0413           | 0.0494            |
| English    | w/out AUX | 3 165         | 0.1731        | 0.1677           | 0.1786            | 2 868         | 0.1569        | 0.1516           | 0.1622            | 381           | 0.0208        | 0.0188           | 0.0230            |
|            | with AUX  | 3 433         | 0.1704        | 0.1653           | 0.1756            | 3 114         | 0.1545        | 0.1496           | 0.1596            | 405           | 0.0201        | 0.0182           | 0.0221            |
| Even       | w/out AUX | 5 139         | 0.3020        | 0.2951           | 0.3089            | 4 572         | 0.2687        | 0.2621           | 0.2754            | 797           | 0.0468        | 0.0437           | 0.0501            |
|            | with AUX  | 5 255         | 0.2988        | 0.2920           | 0.3056            | 4 673         | 0.2657        | 0.2592           | 0.2723            | 816           | 0.0464        | 0.0433           | 0.0496            |
| Hoocak     | w/out AUX | 3 095         | 0.3507        | 0.3408           | 0.3607            | 2 952         | 0.3345        | 0.3247           | 0.3444            | 162           | 0.0184        | 0.0157           | 0.0213            |
|            | with AUX  | 3 357         | 0.3271        | 0.3181           | 0.3362            | 3 206         | 0.3124        | 0.3035           | 0.3214            | 170           | 0.0166        | 0.0142           | 0.0191            |
| N ng       |           | 867           | 0.0901        | 0.0846           | 0.0960            | 863           | 0.0897        | 0.0841           | 0.0956            | 5             | 0.0005        | 0.0001           | 0.0012            |
| Texistepec | w/out AUX | 896           | 0.1181        | 0.1110           | 0.1255            | 887           | 0.1169        | 0.1099           | 0.1243            | 13            | 0.0017        | 0.0009           | 0.0029            |
|            | with AUX  | 1 071         | 0.1198        | 0.1132           | 0.1267            | 1 057         | 0.1182        | 0.1117           | 0.1250            | 18            | 0.0020        | 0.0013           | 0.0031            |
| Overall    | w/out AUX | <b>21 279</b> | <b>0.2057</b> | <b>0.2032</b>    | <b>0.2082</b>     | <b>19 566</b> | <b>0.1892</b> | <b>0.1868</b>    | <b>0.1916</b>     | <b>2 186</b>  | <b>0.0211</b> | <b>0.0202</b>    | <b>0.0221</b>     |
|            | with AUX  | <b>22 100</b> | <b>0.2034</b> | <b>0.2010</b>    | <b>0.2058</b>     | <b>20 337</b> | <b>0.1871</b> | <b>0.1848</b>    | <b>0.1895</b>     | <b>2 242</b>  | <b>0.0206</b> | <b>0.0198</b>    | <b>0.0215</b>     |

**Table S29: Probability of (silent and/or filled) pauses depending on word class of target word for individual languages**

| Language   | Word Class | Probability of (silent and/or filled) pause |               |                  |                  | Comparison    |               |               |
|------------|------------|---------------------------------------------|---------------|------------------|------------------|---------------|---------------|---------------|
|            |            | Count                                       | Est. prob.    | Conf. int. lower | Conf. int. upper | Contrast      | Difference    | In-/Decrease  |
| Baure      | N          | 427                                         | 0.1759        | 0.1612           | 0.1915           | N vs. V       | 0.0248        | 16.41%        |
|            | V          | 595                                         | 0.1511        | 0.1402           | 0.1625           |               |               |               |
| Bora       | N          | 2 039                                       | 0.3703        | 0.3576           | 0.3831           | N vs. V       | 0.1073        | 40.80%        |
|            | V          | 2 054                                       | 0.2630        | 0.2534           | 0.2729           |               |               |               |
| Chintang   | N          | 889                                         | 0.1799        | 0.1694           | 0.1908           | N vs. V       | 0.0693        | 62.66%        |
|            | V          | 812                                         | 0.1106        | 0.1036           | 0.1179           |               |               |               |
| Dutch      | N          | 544                                         | 0.1412        | 0.1305           | 0.1524           | N vs. V       | 0.0209        | 17.37%        |
|            | V          | 757                                         | 0.1203        | 0.1124           | 0.1285           |               |               |               |
| English    | N          | 1 128                                       | 0.1501        | 0.1421           | 0.1583           | N vs. V       | -0.0391       | -20.67%       |
|            | V          | 2 037                                       | 0.1892        | 0.1819           | 0.1967           |               |               |               |
|            | AUX        | 268                                         | 0.1435        | 0.1282           | 0.1600           | N vs. V + AUX | -0.0324       | -17.75%       |
|            | V + AUX    | 2 305                                       | 0.1825        | 0.1758           | 0.1893           |               |               |               |
| Even       | N          | 3 125                                       | 0.3960        | 0.3852           | 0.4068           | N vs. V       | 0.1753        | 79.43%        |
|            | V          | 2 014                                       | 0.2207        | 0.2123           | 0.2293           |               |               |               |
|            | AUX        | 116                                         | 0.2032        | 0.1716           | 0.2376           | N vs. V + AUX | 0.1763        | 80.25%        |
|            | V + AUX    | 2 130                                       | 0.2197        | 0.2115           | 0.2280           |               |               |               |
| Hoocak     | N          | 1 479                                       | 0.4983        | 0.4803           | 0.5163           | N vs. V       | 0.2287        | 84.83%        |
|            | V          | 1 702                                       | 0.2696        | 0.2587           | 0.2806           |               |               |               |
|            | AUX        | 176                                         | 0.1794        | 0.1563           | 0.2044           | N vs. V + AUX | 0.2408        | 93.51%        |
|            | V + AUX    | 1 878                                       | 0.2575        | 0.2475           | 0.2676           |               |               |               |
| N ng       | N          | 446                                         | 0.1356        | 0.1242           | 0.1476           | N vs. V       | 0.0691        | 103.91%       |
|            | V          | 421                                         | 0.0665        | 0.0605           | 0.0728           |               |               |               |
| Texistepec | N          | 415                                         | 0.1742        | 0.1594           | 0.1898           | N vs. V       | 0.0818        | 88.53%        |
|            | V          | 481                                         | 0.0924        | 0.0847           | 0.1005           |               |               |               |
|            | AUX        | 175                                         | 0.1294        | 0.1123           | 0.1481           | N vs. V + AUX | 0.0742        | 74.20%        |
|            | V + AUX    | 656                                         | 0.1000        | 0.0929           | 0.1075           |               |               |               |
| Overall    | N          | <b>10 492</b>                               | <b>0.2573</b> | <b>0.2531</b>    | <b>0.2615</b>    | N vs. V       | <b>0.0850</b> | <b>49.33%</b> |
|            | V          | <b>10 873</b>                               | <b>0.1723</b> | <b>0.1694</b>    | <b>0.1752</b>    |               |               |               |
|            | AUX        | <b>735</b>                                  | <b>0.1541</b> | <b>0.1440</b>    | <b>0.1645</b>    | N vs. V + AUX | <b>0.0863</b> | <b>50.47%</b> |
|            | V + AUX    | <b>11 608</b>                               | <b>0.1710</b> | <b>0.1681</b>    | <b>0.1738</b>    |               |               |               |

**Table S30: Probability of silent pauses depending on word class of target word for individual languages**

| Language   | word class | Probability of silent pause |            |                  |                  | Comparison    |            |              |
|------------|------------|-----------------------------|------------|------------------|------------------|---------------|------------|--------------|
|            |            | Count                       | Est. prob. | Conf. int. lower | Conf. int. upper | Contrast      | Difference | In-/Decrease |
| Baure      | N          | 383                         | 0.1578     | 0.1437           | 0.1727           | N vs. V       | 0.0178     | 12.71%       |
|            | V          | 551                         | 0.1400     | 0.1294           | 0.1510           |               |            |              |
| Bora       | N          | 2 028                       | 0.3683     | 0.3556           | 0.3811           | N vs. V       | 0.1069     | 40.90%       |
|            | V          | 2 041                       | 0.2614     | 0.2517           | 0.2712           |               |            |              |
| Chintang   | N          | 806                         | 0.1631     | 0.1530           | 0.1736           | N vs. V       | 0.0643     | 65.08%       |
|            | V          | 725                         | 0.0988     | 0.0921           | 0.1057           |               |            |              |
| Dutch      | N          | 351                         | 0.0911     | 0.0823           | 0.1005           | N vs. V       | 0.0055     | 6.43%        |
|            | V          | 539                         | 0.0856     | 0.0789           | 0.0927           |               |            |              |
| English    | N          | 991                         | 0.1319     | 0.1244           | 0.1397           | N vs. V       | -0.0424    | -24.33%      |
|            | V          | 1 877                       | 0.1743     | 0.1673           | 0.1816           |               |            |              |
|            | AUX        | 246                         | 0.1318     | 0.1170           | 0.1477           | N vs. V + AUX | -0.0362    | -21.53%      |
|            | V + AUX    | 2 123                       | 0.1681     | 0.1616           | 0.1746           |               |            |              |
| Even       | N          | 2 756                       | 0.3492     | 0.3387           | 0.3598           | N vs. V       | 0.1502     | 75.48%       |
|            | V          | 1 816                       | 0.1990     | 0.1909           | 0.2073           |               |            |              |
|            | AUX        | 101                         | 0.1769     | 0.1472           | 0.2098           | N vs. V + AUX | 0.1515     | 76.63%       |
|            | V + AUX    | 1 917                       | 0.1977     | 0.1899           | 0.2057           |               |            |              |
| Hoocək     | N          | 1 400                       | 0.4717     | 0.4538           | 0.4897           | N vs. V       | 0.2131     | 82.41%       |
|            | V          | 1 633                       | 0.2586     | 0.2479           | 0.2695           |               |            |              |
|            | AUX        | 173                         | 0.1764     | 0.1534           | 0.2011           | N vs. V + AUX | 0.2241     | 90.51%       |
|            | V + AUX    | 1 806                       | 0.2476     | 0.2378           | 0.2576           |               |            |              |
| N ng       | N          | 444                         | 0.1350     | 0.1236           | 0.1470           | N vs. V       | 0.0688     | 103.93%      |
|            | V          | 419                         | 0.0662     | 0.0603           | 0.0725           |               |            |              |
| Texistepec | N          | 412                         | 0.1730     | 0.1582           | 0.1885           | N vs. V       | 0.0817     | 89.49%       |
|            | V          | 475                         | 0.0913     | 0.0837           | 0.0993           |               |            |              |
|            | AUX        | 170                         | 0.1257     | 0.1088           | 0.1442           | N vs. V + AUX | 0.0746     | 75.81%       |
|            | V + AUX    | 645                         | 0.0984     | 0.0913           | 0.1057           |               |            |              |
| Overall    | N          | 9 571                       | 0.2347     | 0.2307           | 0.2388           | N vs. V       | 0.0751     | 47.06%       |
|            | V          | 10 076                      | 0.1596     | 0.1568           | 0.1625           |               |            |              |
|            | AUX        | 690                         | 0.1446     | 0.1349           | 0.1548           | N vs. V + AUX | 0.0761     | 47.98%       |
|            | V + AUX    | 10 766                      | 0.1586     | 0.1558           | 0.1613           |               |            |              |

**Table S31: Probability of filled pauses depending on word class of target word for individual languages**

| Language   | Word Class     | Probability of filled pause |               |                  |                  | Comparison    |               |               |
|------------|----------------|-----------------------------|---------------|------------------|------------------|---------------|---------------|---------------|
|            |                | Count                       | Est. prob.    | Conf. int. lower | Conf. int. upper | Contrast      | Difference    | In-/Decrease  |
| Baure      | N              | 57                          | 0.0235        | 0.0180           | 0.0301           | N vs. V       | 0.0088        | 59.86%        |
|            | V              | 58                          | 0.0147        | 0.0113           | 0.0189           |               |               |               |
| Bora       | N              | 32                          | 0.0058        | 0.0041           | 0.0081           | N vs. V       | 0.0026        | 81.25%        |
|            | V              | 25                          | 0.0032        | 0.0021           | 0.0046           |               |               |               |
| Chintang   | N              | 101                         | 0.0204        | 0.0168           | 0.0247           | N vs. V       | 0.0073        | 55.73%        |
|            | V              | 96                          | 0.0131        | 0.0107           | 0.0159           |               |               |               |
| Dutch      | N              | 217                         | 0.0563        | 0.0494           | 0.0639           | N vs. V       | 0.0179        | 46.61%        |
|            | V              | 242                         | 0.0384        | 0.0339           | 0.0434           |               |               |               |
| English    | N              | 176                         | 0.0234        | 0.0202           | 0.0270           | N vs. V       | 0.0044        | 23.16%        |
|            | V              | 205                         | 0.0190        | 0.0166           | 0.0217           |               |               |               |
|            | AUX            | 24                          | 0.0129        | 0.0084           | 0.0188           | N vs. V + AUX | 0.0053        | 29.28%        |
|            | V + AUX        | 29                          | 0.0181        | 0.0159           | 0.0206           |               |               |               |
| Even       | N              | 513                         | 0.0650        | 0.0597           | 0.0706           | N vs. V       | 0.0339        | 109.00%       |
|            | V              | 284                         | 0.0311        | 0.0277           | 0.0349           |               |               |               |
|            | AUX            | 19                          | 0.0333        | 0.0208           | 0.0505           | N vs. V + AUX | 0.0337        | 107.67%       |
|            | V + AUX        | 303                         | 0.0313        | 0.0279           | 0.0349           |               |               |               |
| Hoocək     | N              | 91                          | 0.0307        | 0.0249           | 0.0374           | N vs. V       | 0.0187        | 155.83%       |
|            | V              | 76                          | 0.0120        | 0.0096           | 0.0150           |               |               |               |
|            | AUX            | 3                           | 0.0031        | 0.0008           | 0.0083           | N vs. V + AUX | 0.0199        | 184.26%       |
|            | V + AUX        | 79                          | 0.0108        | 0.0086           | 0.0134           |               |               |               |
| N ng       | N              | 3                           | 0.0009        | 0.0003           | 0.0025           | N vs. V       | 0.0006        | 200.00%       |
|            | V              | 2                           | 0.0003        | 0.0001           | 0.0010           |               |               |               |
| Texistepec | N              | 5                           | 0.0021        | 0.0008           | 0.0046           | N vs. V       | 0.0006        | 40.00%        |
|            | V              | 8                           | 0.0015        | 0.0007           | 0.0029           |               |               |               |
|            | AUX            | 5                           | 0.0037        | 0.0014           | 0.0082           | N vs. V + AUX | 0.0001        | 5.00%         |
|            | V + AUX        | 13                          | 0.0020        | 0.0011           | 0.0033           |               |               |               |
| Overall    | <b>N</b>       | <b>1195</b>                 | <b>0.0293</b> | <b>0.0277</b>    | <b>0.0309</b>    | N vs. V       | <b>0.0135</b> | <b>85.44%</b> |
|            | <b>V</b>       | <b>996</b>                  | <b>0.0158</b> | <b>0.0148</b>    | <b>0.0168</b>    |               |               |               |
|            | <b>AUX</b>     | <b>51</b>                   | <b>0.0107</b> | <b>0.0080</b>    | <b>0.0139</b>    | N vs. V + AUX | <b>0.0139</b> | <b>90.26%</b> |
|            | <b>V + AUX</b> | <b>1047</b>                 | <b>0.0154</b> | <b>0.0145</b>    | <b>0.0163</b>    |               |               |               |

**Table S32: Comparison of models for predicting pause probability**

| Step               | Fixed effects structure                                                                       | Added                  | AIC    | $\chi^2$ | df | p      | Sig. |
|--------------------|-----------------------------------------------------------------------------------------------|------------------------|--------|----------|----|--------|------|
| <b>1 (initial)</b> | word class + language + word class:language                                                   |                        | 94 736 |          |    |        |      |
| 2a                 | word class + word length + language + word class:language                                     | word length            | 94 614 | 124.20   | 1  | <0.001 | ***  |
| 2b                 | word class + position + language + word class:language                                        | position               | 94 724 | 14.31    | 1  | <0.001 | ***  |
| <b>3a (final)</b>  | word class + word length + position + language + word class:language                          | position               | 94 607 | 9.57     | 1  | 0.002  | **   |
| 3b                 | word class + word length + word class:word length + language + word class:language            | word class:word length | 94 616 | 0.64     | 1  | 0.424  | n.s. |
| 4a                 | word class + word length + position + word class:word length + language + word class:language | word class:word length | 94 608 | 0.54     | 1  | 0.464  | n.s. |
| 4b                 | word class + word length + position + word class:position + language + word class:language    | word class:position    | 94 607 | 1.43     | 1  | 0.232  | n.s. |
| 4c                 | word class + word length + position + word length:position + language + word class:language   | word length:position   | 94 609 | 0.00     | 1  | 0.993  | n.s. |

Notes: Alternative models are given the same step number followed by different letters. The model structure chosen as the next step is marked in bold.

**Table S33: Model predicting pause probability in all nine languages**

| Fixed effect                              | Coefficient | Std. Error | Std. Coefficient | $\chi^2$ | df | p      | sig. | p (BH) | sig. (BH) |
|-------------------------------------------|-------------|------------|------------------|----------|----|--------|------|--------|-----------|
| (intercept)                               | -1.1683     | 0.1366     |                  |          |    |        |      |        |           |
| word class = verb                         | -0.5448     | 0.0460     | -0.6586          | 1 213.90 | 9  | <0.001 | ***  | <0.001 | ***       |
| word length                               | 0.1126      | 0.0101     | 0.2791           | 119.46   | 1  | <0.001 | ***  | <0.001 | ***       |
| position                                  | 0.0948      | 0.0302     | 0.0696           | 9.57     | 1  | 0.002  | **   | 0.003  | **        |
| language = Baure                          | -0.3445     | 0.2405     | -0.2048          | 548.92   | 16 | <0.001 | ***  | <0.001 | ***       |
| language = Chintang                       | -0.5691     | 0.1701     | -0.4554          |          |    |        |      |        |           |
| language = Dutch                          | -1.0376     | 0.1865     | -0.7635          |          |    |        |      |        |           |
| language = English                        | -0.8220     | 0.1599     | -0.7757          |          |    |        |      |        |           |
| language = Even                           | 0.7380      | 0.1727     | 0.6768           |          |    |        |      |        |           |
| language = Hooçak                         | 1.1814      | 0.1820     | 0.8164           |          |    |        |      |        |           |
| language = N  ng                          | -0.7615     | 0.2423     | -0.5471          |          |    |        |      |        |           |
| language = Texistepec                     | -0.5607     | 0.5042     | -0.3616          |          |    |        |      |        |           |
| word class = verb : language = Baure      | 0.3349      | 0.0921     | 0.1585           | 401.26   | 8  | <0.001 | ***  | <0.001 | ***       |
| word class = verb : language = Chintang   | -0.1086     | 0.0763     | -0.0690          |          |    |        |      |        |           |
| word class = verb : language = Dutch      | 0.4177      | 0.0896     | 0.2470           |          |    |        |      |        |           |
| word class = verb : language = English    | 0.8092      | 0.0762     | 0.6113           |          |    |        |      |        |           |
| word class = verb : language = Even       | -0.3475     | 0.0620     | -0.2438          |          |    |        |      |        |           |
| word class = verb : language = Hooçak     | -0.6569     | 0.0757     | -0.3756          |          |    |        |      |        |           |
| word class = verb : language = N  ng      | -0.2241     | 0.1020     | -0.1329          |          |    |        |      |        |           |
| word class = verb : language = Texistepec | -0.2003     | 0.0966     | -0.1083          |          |    |        |      |        |           |
| Random effect                             | Groups      | Std. Dev.  |                  | $\chi^2$ | df | p      | sig. | p (BH) | sig. (BH) |
| (1 speaker)                               | 311         | 0.4560     |                  | 371.75   | 1  | <0.001 | ***  | <0.001 | ***       |
| (1 text)                                  | 346         | 0.3642     |                  | 378.99   | 1  | <0.001 | ***  | <0.001 | ***       |
| (1 word type)                             | 34 972      | 0.5430     |                  | 933.71   | 1  | <0.001 | ***  | <0.001 | ***       |

**Table S34: Model predicting pause probability in Baure**

| Fixed effect      | Coefficient | Std. Error | Std. Coefficient | $\chi^2$ | df | p      | sig. | p (BH) | sig. (BH) |
|-------------------|-------------|------------|------------------|----------|----|--------|------|--------|-----------|
| (intercept)       | -1.9587     | 0.1600     |                  |          |    |        |      |        |           |
| word class = verb | -0.0970     | 0.0848     | -0.1284          | 1.27     | 1  | 0.260  | n.s. | 0.310  | n.s.      |
| word length       | -0.0021     | 0.0458     | -0.0052          | 0.00     | 1  | 0.963  | n.s. | 0.982  | n.s.      |
| position          | 0.6018      | 0.1254     | 0.4941           | 22.64    | 1  | <0.001 | ***  | <0.001 | ***       |
| Random effect     | Groups      | Std. Dev.  |                  | $\chi^2$ | df | p      | sig. | p (BH) | sig. (BH) |
| (1 speaker)       | 10          | 0.0000     |                  | 0.00     | 1  | 0.999  | n.s. | 1.000  | n.s.      |
| (1 text)          | 37          | 0.6093     |                  | 188.67   | 1  | <0.001 | ***  | <0.001 | ***       |
| (1 word type)     | 3 084       | 0.4960     |                  | 23.11    | 1  | <0.001 | ***  | <0.001 | ***       |

**Table S35: Model predicting pause probability in Bora**

| Fixed effect      | Coefficient | Std. Error | Std. Coefficient | $\chi^2$ | df | p      | sig. | p (BH) | sig. (BH) |
|-------------------|-------------|------------|------------------|----------|----|--------|------|--------|-----------|
| (intercept)       | -0.9549     | 0.1786     |                  |          |    |        |      |        |           |
| word class = verb | -0.5703     | 0.0489     | -0.6087          | 134.53   | 1  | <0.001 | ***  | <0.001 | ***       |
| word length       | 0.1880      | 0.0249     | 0.3868           | 54.81    | 1  | <0.001 | ***  | <0.001 | ***       |
| position          | -0.0947     | 0.0724     | -0.0606          | 1.68     | 1  | 0.194  | n.s. | 0.233  | n.s.      |
| Random effect     | Groups      | Std. Dev.  |                  | $\chi^2$ | df | p      | sig. | p (BH) | sig. (BH) |
| (1 speaker)       | 43          | 0.2218     |                  | 0.65     | 1  | 0.420  | n.s. | 0.475  | n.s.      |
| (1 text)          | 37          | 0.6304     |                  | 123.41   | 1  | <0.001 | ***  | <0.001 | ***       |
| (1 word type)     | 6 273       | 0.6113     |                  | 170.63   | 1  | <0.001 | ***  | <0.001 | ***       |



**Table S36: Model predicting pause probability in Chintang**

| Fixed effect      | Coefficient | Std. Error | Std. Coefficient | $\chi^2$ | df | p      | sig. | p (BH) | sig. (BH) |
|-------------------|-------------|------------|------------------|----------|----|--------|------|--------|-----------|
| (intercept)       | -1.7738     | 0.1611     |                  |          |    |        |      |        |           |
| word class = verb | -0.6136     | 0.0643     | -0.8711          | 88.55    | 1  | <0.001 | ***  | <0.001 | ***       |
| word length       | 0.0684      | 0.0314     | 0.1946           | 4.48     | 1  | 0.034  | *    | 0.046  | *         |
| position          | 0.0814      | 0.1057     | 0.0666           | 0.57     | 1  | 0.450  | n.s. | 0.507  | n.s.      |
| Random effect     | Groups      | Std. Dev.  |                  | $\chi^2$ | df | p      | sig. | p (BH) | sig. (BH) |
| (1 speaker)       | 68          | 0.8344     |                  | 55.53    | 1  | <0.001 | ***  | <0.001 | ***       |
| (1 text)          | 40          | 0.4132     |                  | 11.07    | 1  | <0.001 | ***  | 0.001  | **        |
| (1 word type)     | 5 120       | 0.4476     |                  | 29.52    | 1  | <0.001 | ***  | <0.001 | ***       |

**Table S37: Model predicting pause probability in Dutch**

| Fixed effect      | Coefficient | Std. Error | Std. Coefficient | $\chi^2$ | df | p      | sig. | p (BH) | sig. (BH) |
|-------------------|-------------|------------|------------------|----------|----|--------|------|--------|-----------|
| (intercept)       | -2.0995     | 0.1263     |                  |          |    |        |      |        |           |
| word class = verb | -0.1229     | 0.0710     | -0.1784          | 2.96     | 1  | 0.085  | n.s. | 0.104  | n.s.      |
| word length       | 0.0801      | 0.0282     | 0.2824           | 7.81     | 1  | 0.005  | **   | 0.008  | **        |
| position          | 0.0978      | 0.1036     | 0.0899           | 0.88     | 1  | 0.349  | n.s. | 0.406  | n.s.      |
| Random effect     | Groups      | Std. Dev.  |                  | $\chi^2$ | df | p      | sig. | p (BH) | sig. (BH) |
| (1 speaker)       | 42          | 0.4019     |                  | 58.20    | 1  | <0.001 | ***  | <0.001 | ***       |
| (1 text)          | 17          | 0.2222     |                  | 1.15     | 1  | 0.284  | n.s. | 0.334  | n.s.      |
| (1 word type)     | 2 589       | 0.2579     |                  | 3.25     | 1  | 0.071  | n.s. | 0.089  | n.s.      |

**Table S38: Model predicting pause probability in English**

| Fixed effect      | Coefficient | Std. Error | Std. Coefficient | $\chi^2$ | df | p      | sig. | p (BH) | sig. (BH) |
|-------------------|-------------|------------|------------------|----------|----|--------|------|--------|-----------|
| (intercept)       | -1.7336     | 0.0821     |                  |          |    |        |      |        |           |
| word class = verb | 0.2247      | 0.0564     | 0.2922           | 15.42    | 1  | <0.001 | ***  | <0.001 | ***       |
| word length       | 0.0865      | 0.0254     | 0.2445           | 11.09    | 1  | <0.001 | ***  | 0.001  | **        |
| position          | -0.1809     | 0.0726     | -0.1401          | 6.11     | 1  | 0.013  | *    | 0.018  | *         |
| Random effect     | Groups      | Std. Dev.  |                  | $\chi^2$ | df | p      | sig. | p (BH) | sig. (BH) |
| (1 speaker)       | 80          | 0.3646     |                  | 93.01    | 1  | <0.001 | ***  | <0.001 | ***       |
| (1 text)          | 47          | 0.1500     |                  | 3.54     | 1  | 0.060  | n.s. | 0.076  | n.s.      |
| (1 word type)     | 2 941       | 0.3805     |                  | 231.44   | 1  | <0.001 | ***  | <0.001 | ***       |

**Table S39: Model predicting pause probability in Even**

| Fixed effect      | Coefficient | Std. Error | Std. Coefficient | $\chi^2$ | df | p      | sig. | p (BH) | sig. (BH) |
|-------------------|-------------|------------|------------------|----------|----|--------|------|--------|-----------|
| (intercept)       | -0.5166     | 0.0910     |                  |          |    |        |      |        |           |
| word class = verb | -0.9113     | 0.0440     | -0.9898          | 424.28   | 1  | <0.001 | ***  | <0.001 | ***       |
| word length       | 0.1061      | 0.0233     | 0.2107           | 20.08    | 1  | <0.001 | ***  | <0.001 | ***       |
| position          | 0.2395      | 0.0654     | 0.1529           | 13.29    | 1  | <0.001 | ***  | <0.001 | ***       |
| Random effect     | Groups      | Std. Dev.  |                  | $\chi^2$ | df | p      | sig. | p (BH) | sig. (BH) |
| (1 speaker)       | 32          | 0.3475     |                  | 30.05    | 1  | <0.001 | ***  | <0.001 | ***       |
| (1 text)          | 67          | 0.2283     |                  | 39.66    | 1  | <0.001 | ***  | <0.001 | ***       |
| (1 word type)     | 7 357       | 0.6046     |                  | 296.69   | 1  | <0.001 | ***  | <0.001 | ***       |

**Table S40: Model predicting pause probability in Hoocak**

| Fixed effect      | Coefficient | Std. Error | Std. Coefficient | $\chi^2$ | df | p      | sig. | p (BH) | sig. (BH) |
|-------------------|-------------|------------|------------------|----------|----|--------|------|--------|-----------|
| (intercept)       | 0.0722      | 0.1195     |                  |          |    |        |      |        |           |
| word class = verb | -1.2180     | 0.0678     | -1.2059          | 341.25   | 1  | <0.001 | ***  | <0.001 | ***       |
| word length       | 0.1493      | 0.0289     | 0.3177           | 26.21    | 1  | <0.001 | ***  | <0.001 | ***       |
| position          | -0.0260     | 0.0922     | -0.0160          | 0.08     | 1  | 0.780  | n.s. | 0.828  | n.s.      |
| Random effect     | Groups      | Std. Dev.  |                  | $\chi^2$ | df | p      | sig. | p (BH) | sig. (BH) |
| (1 speaker)       | 28          | 0.3821     |                  | 16.09    | 1  | <0.001 | ***  | <0.001 | ***       |
| (1 text)          | 62          | 0.3314     |                  | 40.29    | 1  | <0.001 | ***  | <0.001 | ***       |
| (1 word type)     | 4 231       | 0.6286     |                  | 108.22   | 1  | <0.001 | ***  | <0.001 | ***       |

**Table S41: Model predicting pause probability in Nlmg**

| Fixed effect      | Coefficient | Std. Error | Std. Coefficient | $\chi^2$ | df | p      | sig. | p (BH) | sig. (BH) |
|-------------------|-------------|------------|------------------|----------|----|--------|------|--------|-----------|
| (intercept)       | -2.0622     | 0.3137     |                  |          |    |        |      |        |           |
| word class = verb | -0.7622     | 0.0937     | -1.2626          | 61.37    | 1  | <0.001 | ***  | <0.001 | ***       |
| word length       | 0.0944      | 0.0498     | 0.2901           | 3.33     | 1  | 0.068  | n.s. | 0.086  | n.s.      |
| position          | 0.2893      | 0.1463     | 0.2801           | 3.77     | 1  | 0.052  | n.s. | 0.067  | n.s.      |
| Random effect     | Groups      | Std. Dev.  |                  | $\chi^2$ | df | p      | sig. | p (BH) | sig. (BH) |
| (1 speaker)       | 7           | 0.7005     |                  | 117.33   | 1  | <0.001 | ***  | <0.001 | ***       |
| (1 text)          | 33          | 0.3531     |                  | 16.84    | 1  | <0.001 | ***  | <0.001 | ***       |
| (1 word type)     | 1 162       | 0.5338     |                  | 34.40    | 1  | <0.001 | ***  | <0.001 | ***       |

**Table S42: Model predicting pause probability in Textestepec**

| Fixed effect      | Coefficient | Std. Error | Std. Coefficient | $\chi^2$ | df | p      | sig. | p (BH) | sig. (BH) |
|-------------------|-------------|------------|------------------|----------|----|--------|------|--------|-----------|
| (intercept)       | -2.2171     | 0.1388     |                  |          |    |        |      |        |           |
| word class = verb | -0.7131     | 0.0941     | -1.0256          | 54.61    | 1  | <0.001 | ***  | <0.001 | ***       |
| word length       | 0.1153      | 0.0416     | 0.3786           | 7.37     | 1  | 0.007  | **   | 0.010  | *         |
| position          | 0.6141      | 0.1444     | 0.5219           | 18.47    | 1  | <0.001 | ***  | <0.001 | ***       |
| Random effect     | Groups      | Std. Dev.  |                  | $\chi^2$ | df | p      | sig. | p (BH) | sig. (BH) |
| (1 text)          | 6           | 0.000      |                  | 0.00     | 1  | 1.000  | n.s. | 1.000  | n.s.      |
| (1 word type)     | 2 215       | 0.6838     |                  | 44.12    | 1  | <0.001 | ***  | <0.001 | ***       |

**Table S43: Comparison of models for predicting pause probability (incl. auxiliaries) in all nine languages**

| Step               | Fixed effects structure                                                                       | Added                  | AIC    | $\chi^2$ | df | p      | sig. |
|--------------------|-----------------------------------------------------------------------------------------------|------------------------|--------|----------|----|--------|------|
| <b>1 (initial)</b> | word class + language + word class:language                                                   |                        | 99 209 |          |    |        |      |
| <b>2a</b>          | word class + word length + language + word class:language                                     | word length            | 99 084 | 126.92   | 1  | <0.001 | ***  |
| <b>2b</b>          | word class +position + language + word class:language                                         | position               | 99 194 | 16.88    | 1  | <0.001 | ***  |
| <b>3a (final)</b>  | word class + word length + position + language + word class:language                          | position               | 99 075 | 11.38    | 1  | <0.001 | ***  |
| 3b                 | word class + word length + word class:word length + language + word class:language            | word class:word length | 99 086 | 0.44     | 1  | 0.506  | n.s. |
| 4a                 | word class + word length + position + word class:word length + language + word class:language | word class:word length | 99 077 | 0.34     | 1  | 0.560  | n.s. |
| 4b                 | word class + word length + position + word class:position + language + word class:language    | word class:position    | 99 076 | 1.04     | 1  | 0.308  | n.s. |
| 4c                 | word class + word length + position + word length:position + language + word class:language   | word length:position   | 99 076 | 0.50     | 1  | 0.479  | n.s. |

Notes: Alternative models are given the same step number followed by different letters. The model structure chosen as the next step is marked in bold.

**Table S44: Model predicting pause probability (incl. auxiliaries) in all nine languages**

| Fixed effect                              | Coefficient | Std. Error | Std. Coefficient | $\chi^2$ | df | p      | sig. | p (BH) | sig. (BH) |
|-------------------------------------------|-------------|------------|------------------|----------|----|--------|------|--------|-----------|
| (intercept)                               | -1.1696     | 0.1359     |                  |          |    |        |      |        |           |
| word class = verb                         | -0.5454     | 0.0461     | -0.6560          | 1312.70  | 9  | <0.001 | ***  | <0.001 | ***       |
| word length                               | 0.1117      | 0.0099     | 0.2830           | 121.42   | 1  | <0.001 | ***  | <0.001 | ***       |
| position                                  | 0.1015      | 0.0297     | 0.0747           | 11.38    | 1  | <0.001 | ***  | 0.001  | **        |
| language = Baure                          | -0.3480     | 0.2392     | -0.2030          | 592.65   | 16 | <0.001 | ***  | <0.001 | ***       |
| language = Chintang                       | -0.5712     | 0.1695     | -0.4493          |          |    |        |      |        |           |
| language = Dutch                          | -1.0399     | 0.1859     | -0.7517          |          |    |        |      |        |           |
| language = English                        | -0.8268     | 0.1592     | -0.7983          |          |    |        |      |        |           |
| language = Even                           | 0.7402      | 0.1718     | 0.6773           |          |    |        |      |        |           |
| language = Hoocak                         | 1.1792      | 0.1809     | 0.8568           |          |    |        |      |        |           |
| language = N ng                           | -0.7660     | 0.2398     | -0.5406          |          |    |        |      |        |           |
| language = Texistepec                     | -0.5464     | 0.4987     | -0.3730          |          |    |        |      |        |           |
| word class = verb : language = Baure      | 0.3362      | 0.0922     | 0.1561           |          |    |        |      |        |           |
| word class = verb : language = Chintang   | -0.1094     | 0.0764     | -0.0682          |          |    |        |      |        |           |
| word class = verb : language = Dutch      | 0.4177      | 0.0897     | 0.2424           |          |    |        |      |        |           |
| word class = verb : language = English    | 0.8076      | 0.0756     | 0.6431           |          |    |        |      |        |           |
| word class = verb : language = Even       | -0.3463     | 0.0618     | -0.2453          |          |    |        |      |        |           |
| word class = verb : language = Hoocak     | -0.7665     | 0.0743     | -0.4766          |          |    |        |      |        |           |
| word class = verb : language = N ng       | -0.2235     | 0.1021     | -0.1300          |          |    |        |      |        |           |
| word class = verb : language = Texistepec | -0.1352     | 0.0954     | -0.0800          |          |    |        |      |        |           |
|                                           |             |            |                  |          |    |        |      |        |           |
| Random effect                             | Groups      | Std. Dev.  |                  | $\chi^2$ | df | p      | sig. | p (BH) | sig. (BH) |
| (1 speaker)                               | 311         | 0.4511     |                  | 369.63   | 1  | <0.001 | ***  | <0.001 | ***       |
| (1 text)                                  | 346         | 0.3669     |                  | 395.13   | 1  | <0.001 | ***  | <0.001 | ***       |
| (1 word type)                             | 35 821      | 0.5474     |                  | 979.87   | 1  | <0.001 | ***  | <0.001 | ***       |

**Table S45: Model predicting pause probability (incl. auxiliaries) in English**

| Fixed effect      | Coefficient | Std. Error | Std. Coefficient | $\chi^2$ | df | p      | sig. | p (BH) | sig. (BH) |
|-------------------|-------------|------------|------------------|----------|----|--------|------|--------|-----------|
| (intercept)       | -1.7760     | 0.0802     |                  |          |    |        |      |        |           |
| word class = verb | 0.2260      | 0.0552     | 0.2906           | 16.34    | 1  | <0.001 | ***  | <0.001 | ***       |
| word length       | 0.0896      | 0.0246     | 0.2652           | 12.62    | 1  | <0.001 | ***  | <0.001 | ***       |
| position          | -0.1215     | 0.0699     | -0.0945          | 2.98     | 1  | 0.084  | n.s. | 0.103  | n.s.      |
| Random effect     | Groups      | Std. Dev.  |                  | $\chi^2$ | df | p      | sig. | p (BH) | sig. (BH) |
| (1 speaker)       | 80          | 0.3598     |                  | 89.90    | 1  | <0.001 | ***  | <0.001 | ***       |
| (1 text)          | 47          | 0.1486     |                  | 3.25     | 1  | 0.071  | n.s. | 0.089  | n.s.      |
| (1 word type)     | 2 952       | 0.3639     |                  | 240.86   | 1  | <0.001 | ***  | <0.001 | ***       |

**Table S46: Model predicting pause probability (incl. auxiliaries) in Even**

| Fixed effect      | Coefficient | Std. Error | Std. Coefficient | $\chi^2$ | df | p      | sig. | p (BH) | sig. (BH) |
|-------------------|-------------|------------|------------------|----------|----|--------|------|--------|-----------|
| (intercept)       | -0.5060     | 0.0915     |                  |          |    |        |      |        |           |
| word class = verb | -0.9086     | 0.0433     | -0.9873          | 434.16   | 1  | <0.001 | ***  | <0.001 | ***       |
| word length       | 0.1069      | 0.0228     | 0.2144           | 21.24    | 1  | <0.001 | ***  | <0.001 | ***       |
| position          | 0.2296      | 0.0646     | 0.1465           | 12.52    | 1  | <0.001 | ***  | <0.001 | ***       |
| Random effect     | Groups      | Std. Dev.  |                  | $\chi^2$ | df | p      | sig. | p (BH) | sig. (BH) |
| (1 speaker)       | 32          | 0.3518     |                  | 30.28    | 1  | <0.001 | ***  | <0.001 | ***       |
| (1 text)          | 67          | 0.2334     |                  | 43.52    | 1  | <0.001 | ***  | <0.001 | ***       |
| (1 word type)     | 7 428       | 0.5982     |                  | 297.96   | 1  | <0.001 | ***  | <0.001 | ***       |

**Table S47: Model predicting pause probability (incl. auxiliaries) in Hoocak**

| Fixed effect      | Coefficient | Std. Error | Std. Coefficient | $\chi^2$ | df | p      | sig. | p (BH) | sig. (BH) |
|-------------------|-------------|------------|------------------|----------|----|--------|------|--------|-----------|
| (intercept)       | 0.0804      | 0.1180     |                  |          |    |        |      |        |           |
| word class = verb | -1.3343     | 0.0667     | -1.2894          | 423.52   | 1  | <0.001 | ***  | <0.001 | ***       |
| word length       | 0.1552      | 0.0275     | 0.3373           | 31.42    | 1  | <0.001 | ***  | <0.001 | ***       |
| position          | -0.0399     | 0.0868     | -0.0252          | 0.21     | 1  | 0.650  | n.s. | 0.703  | n.s.      |
| Random effect     | Groups      | Std. Dev.  |                  | $\chi^2$ | df | p      | sig. | p (BH) | sig. (BH) |
| (1 speaker)       | 28          | 0.3735     |                  | 19.26    | 1  | <0.001 | ***  | <0.001 | ***       |
| (1 text)          | 62          | 0.3419     |                  | 52.77    | 1  | <0.001 | ***  | <0.001 | ***       |
| (1 word type)     | 4 968       | 0.6527     |                  | 125.98   | 1  | <0.001 | ***  | <0.001 | ***       |

**Table S48: Model predicting pause probability (incl. auxiliaries) in Textistepec**

| Fixed effect      | Coefficient | Std. Error | Std. Coefficient | $\chi^2$ | df | p      | sig. | p (BH) | sig. (BH) |
|-------------------|-------------|------------|------------------|----------|----|--------|------|--------|-----------|
| (intercept)       | -2.2601     | 0.1364     |                  |          |    |        |      |        |           |
| word class = verb | -0.6477     | 0.0956     | -0.8818          | 44.67    | 1  | <0.001 | ***  | <0.001 | ***       |
| word length       | 0.0825      | 0.0414     | 0.2767           | 3.87     | 1  | 0.049  | *    | 0.064  | n.s.      |
| position          | 0.6617      | 0.1374     | 0.5599           | 23.74    | 1  | <0.001 | ***  | <0.001 | ***       |
| Random effect     | Groups      | Std. Dev.  |                  | $\chi^2$ | df | p      | sig. | p (BH) | sig. (BH) |
| (1 text)          | 6           | 0.0000     |                  | 0.00     | 1  | 0.999  | n.s. | 1.000  | n.s.      |
| (1 word type)     | 2 245       | 0.7583     |                  | 81.82    | 1  | <0.001 | ***  | <0.001 | ***       |

**Table S49: Size of word class effect on pause probability**

| language                      | auxiliaries excluded |              |                   |                           | auxiliaries included |              |                   |                           |
|-------------------------------|----------------------|--------------|-------------------|---------------------------|----------------------|--------------|-------------------|---------------------------|
|                               | pause probability    |              | probability ratio | odds ratio <sup>b</sup>   | pause probability    |              | probability ratio | odds ratio <sup>b</sup>   |
|                               | before nouns         | before verbs |                   |                           | before nouns         | before verbs |                   |                           |
| Baure                         | 0.1760               | 0.1624       | 1.0837            | 1.1018                    |                      |              |                   |                           |
| Bora                          | 0.2841               | 0.1832       | 1.5508            | 1.7687                    |                      |              |                   |                           |
| Chintang                      | 0.1573               | 0.0918       | 1.7135            | 1.8471                    |                      |              |                   |                           |
| Dutch                         | 0.1207               | 0.1082       | 1.1155            | 1.1307                    |                      |              |                   |                           |
| English                       | 0.1428               | 0.1726       | 0.8273            | 0.7988                    | 0.1409               | 0.1705       | 0.8264            | 0.7977                    |
| Even                          | 0.4232               | 0.2278       | 1.8578            | 2.4876                    | 0.4236               | 0.2285       | 1.8538            | 2.4808                    |
| Hoocak                        | 0.5325               | 0.2521       | 2.1123            | 3.3807                    | 0.5346               | 0.2322       | 2.3023            | 3.7979                    |
| N ng                          | 0.1445               | 0.0731       | 1.9767            | 2.1432                    |                      |              |                   |                           |
| Textistepec                   | 0.1508               | 0.0800       | 1.8850            | 2.0404                    | 0.1427               | 0.0801       | 1.7815            | 1.9113                    |
| <b>grand mean<sup>a</sup></b> |                      |              | <b>1.5692</b>     | <b>1.7015<sup>c</sup></b> |                      |              | <b>1.5782</b>     | <b>1.7104<sup>c</sup></b> |

Notes: <sup>a</sup> We averaged across all nine languages, both when excluding and when including auxiliaries. We did, however, not repeat unchanged results in the *auxiliaries included* columns.

<sup>b</sup> Odds ratios were calculated by inverting the exponentiated coefficients of the word class factor from the logistic regression models for individual languages. <sup>c</sup> The mean of the odds ratios was calculated on the log scale and subsequently exponentiated.

## References

1. Danielsen S, Riedel F, Admiraal F, Terhart L (2009) *Baure Documentation* (The Language Archive, Nijmegen) Available at: <https://hdl.handle.net/1839/00-0000-0000-000D-8382-B>.
2. Seifart F (2009) Bora documentation. *A Multimedia Documentation of the Languages of the People of the Center. Online Publication of Transcribed and Translated Bora, Ocaina, Nonuya, Resígaro, and Witoto Audio and Video Recordings with Linguistic and Ethnographic Annotations and Descriptions*, eds Seifart F, Fagua D, Gasché J, Echeverri JA (The Language Archive, Nijmegen). Available at: <https://hdl.handle.net/1839/00-0000-0000-0008-38E5-2>.
3. Bickel B, et al. (2011) *Audiovisual corpus of the Chintang language, including a longitudinal corpus of language acquisition by six children: ca. 650,000 words transcribed and translated, of which ca. 450,000 glossed, plus paradigm sets and grammar sketches, ethnographic descriptions, photographs* (The Language Archive, Nijmegen) Available at: <https://hdl.handle.net/1839/00-0000-0000-0005-6F41-C>.
4. CGN-consortium, Language and Speech Nijmegen, ELIS Gent (2003) *Corpus Gesproken Nederlands* (Nederlandse Taalunie, Nijmegen).
5. Calhoun S, et al. (2009) *NXT Switchboard Annotations LDC2009T26* (Linguistic Data Consortium, Philadelphia).
6. Pakendorf B, Matic D, Aralova N, Lavrillier A (2010) *Documentation of the dialectal and cultural diversity among Êvens in Siberia* (DOBES, MPIP, MPI-EVA, Nijmegen, Leipzig). Available at: <https://hdl.handle.net/1839/00-0000-0000-000F-2DFE-0>.
7. Hartmann I (2013) *Hoocqk Corpus* (MPI-EVA, Leipzig).
8. Güldemann T, Ernszt M, Siegmund S, Witzlack-Makarevich A (2011) *A Text documentation of Nuú* (ELAR, London). Available at: <https://elar.soas.ac.uk/Collection/MPI194591>.
9. Wichmann S (1996) *Cuentos y colorados en popoluca de Texistepec* (C.A. Reitzel, Copenhagen). Available at: <https://www.ailla.utexas.org/islandora/object/ailla%3A124443>.
10. Simons GF, Fennig CD (2017) *Ethnologue: Languages of the World, Twentieth edition* (SIL International, Dallas, Texas) Available at: <http://www.ethnologue.com>.
11. Hammarström H, Forkel R, Haspelmath M (2017) *Glottolog 3.0* (Max Planck Institute for the Science of Human History, Jena) Available at: <http://glottolog.org/>.
